# Supplementary material for: Cu(ii)-catalyzed C–N coupling of 2-aminobenzothiazoles with boronic acids at room temperature
Source: Royal Society of Chemistry journal article supplement (doi:10.1039/d3ra02979d), 2023-01-01

Supplementary information for

## **Cu(II)-catalyzed C-N coupling of 2-aminobenzothiazoles with boronic acids at room temperature**

Sankaran Radhika,<sup>[a]</sup> Aravind Chandravarkar,<sup>[a]</sup> Gopinathan Anilkumar<sup>[a]\*</sup>

<sup>[a]</sup> School of Chemical Sciences, Mahatma Gandhi University, Priyadarsini Hills P O, Kottayam, Kerala, India, 686560, [anilgil@yahoo.com](mailto:anilgil@yahoo.com), [anil@mgu.ac.in](mailto:anil@mgu.ac.in)

### **Table of Contents for the Supporting Information**

|                                                                    |    |
|--------------------------------------------------------------------|----|
| 1. General Remarks                                                 | 1  |
| 2. Procedure for the synthesis of 2-Aminobenzothiazole derivatives | 2  |
| 3. Optimization reactions                                          | 2  |
| 4. Compound Characterization Data                                  | 5  |
| 5. References                                                      | 13 |
| 6. <sup>1</sup> H and <sup>13</sup> C NMR Spectra of Compounds     | 13 |

#### **1. General Remarks**

Acetonitrile, DMSO, 1,10-Phenanthroline, copper(II) acetate, Cu(I) iodide, phenylboronic acid, 3-nitro, 3-fluoro, 4-chloro and 2-fluoro phenylboronic acids were acquired from Sigma-Aldrich. DME, DCE, 4-CF<sub>3</sub>, 2-methyl and 4-fluoro phenylboronic acids were bought from Spectrochem. Potassium phosphate and 2-aminobenzothiazole were procured from Alfa aesar. 6-Methyl 2-aminobenzothiazole and 2-aminothiazole were obtained from TCI Co., Ltd. Hexane, ethyl acetate and silica gel (100–200 mesh) utilized in column chromatography were purchased from Merck Specialties Pvt. Ltd. We have utilized distilled solvents for all reactions and purification. Reactions were performed in an oven dried 50 mL round bottom flask under stirring at room temperature. The NMR spectra were noted with Bruker-400 MHz NMR spectrometer instrument [400 (<sup>1</sup>H) and 100 (<sup>13</sup>C) MHz]. The chemical shift values were defined in ‘ppm’ relative to TMS (<sup>1</sup>H) and CDCl<sub>3</sub> (<sup>13</sup>C) as internal standards. Coupling constants (*J*) were specified in Hertz (Hz). The HRMS and GC-MS were recorded on XEVO G2 Q-TOF (Waters) and Agilent mass spectrometers respectively. Thin layer

chromatography (using Merck Silica Gel 60/UV254) was performed through UV fluorescence and iodine chamber.

## 2. Procedure for the synthesis of 2-Aminobenzothiazole derivatives.

2-Aminobenzothiazole derivatives (0.50 mmol, 1 *equiv.*) and phenylboronic acid derivatives (0.60 mmol, 1.2 *equiv.*) were taken in an oven dried 50 ml round bottom flask with 3 mL of acetonitrile. To this 10 mol% of Cu(OAc)<sub>2</sub>, 20 mol% of 1,10-phenanthroline and 1.5 equiv. of K<sub>3</sub>PO<sub>4</sub> were added and stirred well for 24 h at room temperature. The reaction was then quenched by adding distilled water and extracted with ethyl acetate (3x15 mL). Ethyl acetate layer was washed with brine solution, separated and dried using anhydrous sodium sulphate. Organic layer was concentrated and the crude product was purified by column chromatography, employing hexane and ethyl acetate as the eluent.

## 3. Optimization Reactions

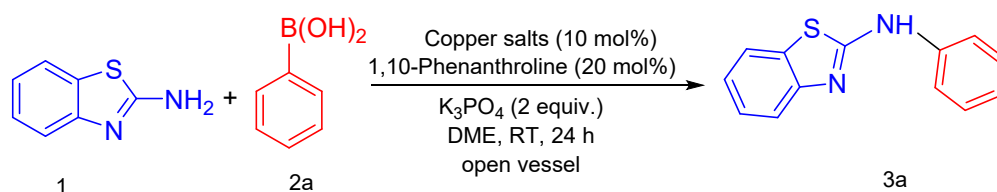

**Table S1.** Screening of various copper salts.

| Entry | Copper Salts                                                   | Yield (%) of 3a <sup>a,b</sup> |
|-------|----------------------------------------------------------------|--------------------------------|
| 1.    | CuI                                                            | 30                             |
| 2.    | CuBr                                                           | 28                             |
| 3.    | CuBr <sub>2</sub>                                              | 51                             |
| 4.    | Cu(OAc) <sub>2</sub>                                           | 62                             |
| 5.    | Cu(O <sub>2</sub> C <sub>5</sub> H <sub>7</sub> ) <sub>2</sub> | 50                             |
| 6.    | -                                                              | nd                             |

<sup>a)</sup> Reaction conditions: 2-Aminobenzothiazole (1 equiv.), Phenylboronic acid (1.2 equiv.), Cu salts (10 mol%), 1,10-phenanthroline (20 mol%), K<sub>3</sub>PO<sub>4</sub> (2 equiv.), DME (2 mL), reaction time: 24 h, temperature: RT, air. Open vessel. <sup>b)</sup> Isolated yield. nd = not detected.

**Table S2.** Optimization of ligands.

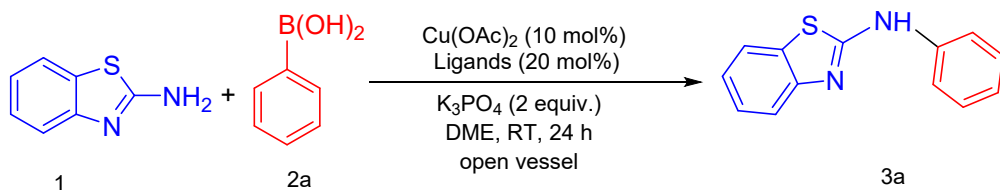

| Entry | Ligands                              | Yield (%) of 3a <sup>a,b</sup> |
|-------|--------------------------------------|--------------------------------|
| 1.    | <i>L</i> -Proline                    | 42                             |
| 2.    | DABCO                                | 20                             |
| 3.    | DMEDA                                | 55                             |
| 4.    | Triphenyl phosphine                  | 30                             |
| 5.    | 1,10-Phenanthroline                  | 62                             |
| 6.    | 2,2'-Bipyridine                      | 60                             |
| 7.    | Ethylene diamine                     | 46                             |
| 8.    | <i>Trans</i> -1,2-diaminocyclohexane | 10                             |
| 9.    | <i>Trans</i> -1,2-cyclohexanediol    | 14                             |
| 10.   | 1,1'-Bi-2-naphthol                   | 42                             |
| 11.   | Ethylene glycol                      | 37                             |
| 12.   | -                                    | Traces <sup>c</sup>            |

<sup>[a]</sup> Reaction conditions: 2-Aminobenzothiazole (1 equiv.), Phenylboronic acid (1.2 equiv.), Cu(OAc)<sub>2</sub> (10 mol%), Ligands (20 mol%), K<sub>3</sub>PO<sub>4</sub> (2 equiv.), DME (2 mL), reaction time: 24 h, temperature: RT, air. Open vessel. <sup>[b]</sup> Isolated yield. <sup>[c]</sup> Absence of ligands.

**Table S3.** Optimization of bases.

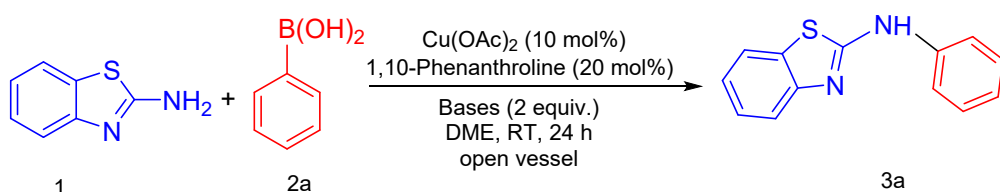

| Entry | Bases               | Yield (%) of 3a <sup>a,b</sup> |
|-------|---------------------|--------------------------------|
| 1     | Potassium Carbonate | 45                             |
| 2     | Potassium Phosphate | 62                             |
| 3     | Potassium Hydroxide | 51                             |
| 4     | Cyclohexylamine     | 36                             |
| 5     | Dicyclohexylamine   | 27                             |
| 6     | Cesium Carbonate    | 56                             |

|    |                                 |                 |
|----|---------------------------------|-----------------|
| 7  | Sodium carbonate                | 39              |
| 8  | Sodium Hydroxide                | 46              |
| 9. | Triethylamine                   | 20              |
| 10 | DBU                             | 43              |
| 11 | DABCO                           | 41              |
| 12 | Sodium Bicarbonate              | 19              |
| 13 | Sodium <i>tert</i> -butoxide    | 17              |
| 14 | Lithium <i>tert</i> -butoxide   | 23              |
| 15 | Potassium <i>tert</i> -butoxide | 19              |
| 16 | Sodium Acetate                  | Traces          |
| 17 | -                               | 18 <sup>c</sup> |

<sup>[a]</sup> Reaction conditions: 2-Aminobenzothiazole (1 equiv.), Phenylboronic acid (1.2 equiv.), Cu(OAc)<sub>2</sub> (10 mol%), 1,10-Phenanthroline (20 mol%), bases (2 equiv.), DME (2 mL), reaction time: 24 h, temperature: RT, air. Open vessel. <sup>[b]</sup> Isolated yield. <sup>[c]</sup> Absence of bases.

**Table S4.** Optimization of solvents.

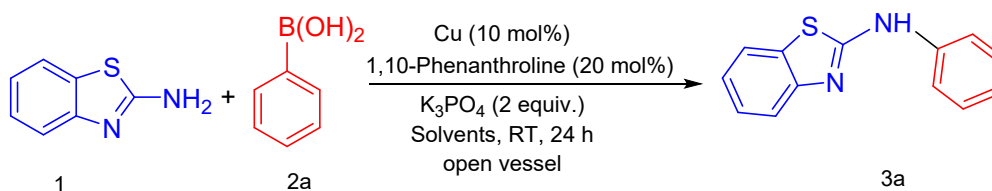

| Entry | Solvents        | Yield (%) of 3a <sup>a,b</sup> |
|-------|-----------------|--------------------------------|
| 1     | DME             | 62                             |
| 2     | DCE             | 70                             |
| 3     | DCM             | 60                             |
| 4     | Acetonitrile    | 76                             |
| 5     | Chlorobenzene   | 66                             |
| 6     | Dichlorobenzene | 70                             |
| 7     | 1,4-Dioxane     | 45                             |
| 8     | Chloroform      | 45                             |
| 9.    | Toluene         | 38                             |
| 10    | DMF             | 41                             |
| 11    | THF             | 30                             |
| 12    | DMSO            | 40                             |
| 13    | NMP             | 38                             |

|    |                 |                 |
|----|-----------------|-----------------|
| 14 | Water           | 20 <sup>c</sup> |
| 15 | Ethylene glycol | 11              |
| 16 | 2-Propanol      | 15              |
| 17 | BuOH            | 16              |
| 18 | Ethanol         | 26              |
| 19 | Methanol        | 20              |

<sup>[a]</sup> Reaction conditions: 2-Aminobenzothiazole (1 equiv.), Phenylboronic acid (1.2 equiv.), Cu(OAc)<sub>2</sub> (10 mol%), 1,10-Phenanthroline (20 mol%), K<sub>3</sub>PO<sub>4</sub> (2 equiv.), solvents (2 mL), reaction time: 24 h, temperature: RT, air. Open vessel. <sup>[b]</sup> Isolated yield. <sup>[c]</sup> 1 equiv. of TBAB used.

**Table S5.** Optimization of time and temperature.

| Entry | Time (h) | Temperature (°C) | Yield (%) of 3a <sup>a,b</sup> |
|-------|----------|------------------|--------------------------------|
| 1.    | 24       | RT               | 76                             |
| 2.    | 24       | 45               | 35                             |
| 3.    | 24       | 65               | 10                             |
| 4.    | 18       | RT               | 61                             |
| 5.    | 30       | RT               | 73                             |

<sup>[a]</sup> Reaction conditions: 2-Aminobenzothiazole (1 equiv.), Phenylboronic acid (1.2 equiv.), Cu(OAc)<sub>2</sub> (10 mol%), 1,10-Phenanthroline (20 mol%), K<sub>3</sub>PO<sub>4</sub> (2 equiv.), Acetonitrile (2 mL), reaction time: 18-30 h, temperature: RT-65 °C, air. Open vessel. <sup>[b]</sup> Isolated yield.

**Table S6.** Optimization of catalyst and ligand loading.

| Entry | Cu(OAc) <sub>2</sub> (mol%) | 1,10-Phenanthroline (mol%) | Yield (%) of 3a <sup>a,b</sup> |
|-------|-----------------------------|----------------------------|--------------------------------|
| 1.    | 5                           | 10                         | 68                             |
| 2.    | 10                          | 20                         | 76                             |
| 3.    | 15                          | 30                         | 60                             |
| 4.    | 10                          | 10                         | 63                             |
| 5.    | 10                          | 20                         | 75 <sup>c</sup>                |
| 6.    | 10                          | 20                         | 36 <sup>d</sup>                |
| 7.    | 10                          | 20                         | 77 <sup>e</sup>                |
| 8.    | 10                          | 20                         | 19 <sup>f</sup>                |

<sup>[a]</sup> Reaction conditions: 2-Aminobenzothiazole (1 equiv.), Phenylboronic acid (1.2 equiv.), Cu(OAc)<sub>2</sub> (5-15 mol%), 1,10-Phenanthroline (10-30 mol%), K<sub>3</sub>PO<sub>4</sub> (2 equiv.), Acetonitrile (2 mL), reaction time: 24 h,

temperature: RT, air. Open vessel. <sup>[b]</sup> Isolated yield. <sup>[c]</sup> 1.5 equiv. of K<sub>3</sub>PO<sub>4</sub>, <sup>[d]</sup> Excess of O<sub>2</sub>, <sup>[e]</sup> 1.6 equiv. of Phenylboronic acid. <sup>[f]</sup> in N<sub>2</sub> atmosphere.

#### 4. Compound Characterization Data

##### 3a. *N*-Phenylbenzo[*d*]thiazol-2-amine

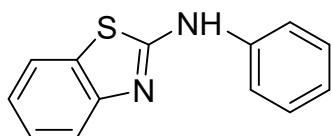

Chemical Formula: C<sub>13</sub>H<sub>10</sub>N<sub>2</sub>S; Appearance: White spongy powder; Yield: 76%; MP: 158-161 °C (lit.<sup>1</sup>158-160 °C); **FT-IR** (neat): 3186, 3126, 2931, 1618, 1325, 1293, 1128 cm<sup>-1</sup>; **<sup>1</sup>H NMR** (CDCl<sub>3</sub>, 400 MHz) δ 7.64-7.60 (m, 2H), 7.52 (d, *J* = 8.8 Hz, 2H), 7.41 (t, *J* = 8.4 Hz, 2H), 7.34 (t, *J* = 8.4 Hz, 1H), 7.17 (t, *J* = 7.6 Hz, 2H) ppm; **<sup>13</sup>C NMR** (CDCl<sub>3</sub>, 100 MHz) δ 164.2, 151.3, 139.6, 129.9, 129.5, 126.1, 124.3, 122.4, 120.8, 120.0, 119.4 ppm; **HRMS** (QToF): *m/z* calculated for C<sub>13</sub>H<sub>10</sub>N<sub>2</sub>S ([M + H]<sup>+</sup>): 227.0643, found: 227.0650.

##### 3b. *N*-(3-Nitrophenyl)benzo[*d*]thiazol-2-amine

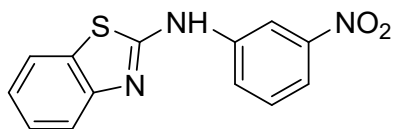

Chemical Formula: C<sub>13</sub>H<sub>9</sub>N<sub>3</sub>O<sub>2</sub>S; Appearance: Yellow powder; Yield: 72%; MP: 192-194 °C (lit.<sup>2</sup> 190-193 °C); **FT-IR** (neat): 3123, 3074, 2943, 1616, 1346, 1263, 1129 cm<sup>-1</sup>; **<sup>1</sup>H NMR** (DMSO-*d*<sub>6</sub>, 400 MHz) δ 11.02 (brs, 1H), 8.87 (s, 1H), 8.08 (d, *J* = 8.4 Hz, 1H), 7.87 (d, *J* = 8.0 Hz, 2H), 7.68-7.62 (m, 2H), 7.37 (t, *J* = 7.2 Hz, 1H), 7.21 (t, *J* = 7.2 Hz, 1H) ppm; **<sup>13</sup>C NMR** (DMSO-*d*<sub>6</sub>, 100 MHz) δ 161.2, 151.6, 148.3, 141.6, 130.4, 130.0, 126.2, 123.6, 123.0, 121.3, 119.8, 116.4, 111.6 ppm; **HRMS** (QToF): *m/z* calculated for C<sub>13</sub>H<sub>9</sub>N<sub>3</sub>O<sub>2</sub>S ([M + H]<sup>+</sup>): 272.0494, found: 272.0484.

##### 3c. *N*-(4-(Trifluoromethyl)phenyl)benzo[*d*]thiazol-2-amine

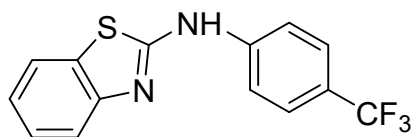

Chemical Formula:  $C_{14}H_9F_3N_2S$ ; Appearance: White powder; Yield: 70%; MP: 187-190 °C (lit.<sup>2</sup> 189-191 °C); **FT-IR** (neat): 3135, 3036, 2905, 1611, 1316, 1221, 1181  $cm^{-1}$ ; **<sup>1</sup>H NMR** ( $CDCl_3$ , 400 MHz)  $\delta$  7.70-7.62 (m, 6H), 7.39 (t,  $J = 8.0$  Hz, 1H), 7.23 (t,  $J = 8.0$  Hz, 1H) ppm; **<sup>13</sup>C NMR** ( $CDCl_3$ , 100 MHz)  $\delta$  162.1, 151.0, 142.7, 130.0, 126.7 (q,  $^4J_{CF} = 3.6$  Hz, 2C), 126.4, 125.5, 124.9, 123.2, 120.9, 120.0, 118.2 ppm; **HRMS** (QToF):  $m/z$  calculated for  $C_{14}H_9F_3N_2S$  ( $[M + H]^+$ ): 295.0517, found: 295.0512.

### 3d. *N*-(3-(Trifluoromethyl)phenyl)benzo[*d*]thiazol-2-amine

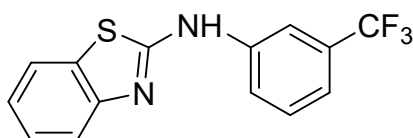

Chemical Formula:  $C_{14}H_9F_3N_2S$ ; Appearance: White powder; Yield: 51%; MP: 140-142 °C; **FT-IR** (neat): 3189, 3067, 2947, 1602, 1321, 1280, 1183  $cm^{-1}$ ; **<sup>1</sup>H NMR** ( $DMSO-d_6$ , 400 MHz)  $\delta$  10.86 (brs, 1H), 8.29 (s, 1H), 8.01 (d,  $J = 7.6$  Hz, 1H), 7.84 (d,  $J = 7.6$  Hz, 1H), 7.66 (d,  $J = 7.6$  Hz, 1H), 7.58 (t,  $J = 8.0$  Hz, 1H), 7.35 (t,  $J = 8.0$  Hz, 2H), 7.18 (t,  $J = 7.6$  Hz, 1H) ppm; **<sup>13</sup>C NMR** ( $DMSO-d_6$ , 100 MHz)  $\delta$  161.3, 151.8, 141.3, 130.2, 130.1, 129.7 (q,  $^2J_{CF} = 32$  Hz, 1C), 126.1, 125.6 (q,  $^1J_{CF} = 270$  Hz, 1C), 122.8, 121.2, 119.7, 118.2, 117.8, 113.6 ppm; **GC-MS** (EI):  $m/z$  calculated for  $C_{14}H_9F_3N_2S$  ( $M^+$ ): 294.0, found: 294.1.

### 3e. *N*-(4-Chlorophenyl)benzo[*d*]thiazol-2-amine

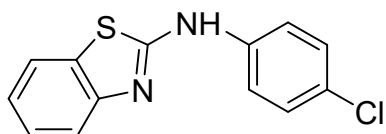

Chemical Formula:  $C_{13}H_9ClN_2S$ ; Appearance: White solid; Yield: 92%; MP: 206-208 °C (lit.<sup>1</sup> 208-209 °C); **FT-IR** (neat): 3174, 3066, 2919, 1615, 1324, 1265, 1130  $cm^{-1}$ ; **<sup>1</sup>H NMR** ( $CDCl_3$ , 400 MHz)  $\delta$  7.66 (d,  $J = 7.6$  Hz, 2H), 7.51 (d,  $J = 8.8$  Hz, 2H), 7.38-7.33 (m, 3H), 7.19 (t,  $J = 8.4$  Hz, 1H) ppm; **<sup>13</sup>C NMR** ( $CDCl_3$ , 100 MHz)  $\delta$  163.1, 151.7, 138.4, 130.2,

129.6, 129.0, 126.4, 122.9, 120.9, 120.0, 96.2 ppm; **HRMS** (QToF):  $m/z$  calculated for  $C_{13}H_9ClN_2S$  ( $[M + H]^+$ ): 261.0253, found: 261.0261.

### 3f. *N*-(4-Fluorophenyl)benzo[*d*]thiazol-2-amine

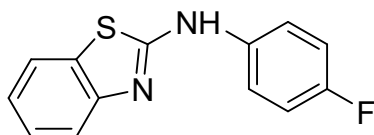

Chemical Formula:  $C_{13}H_9FN_2S$ ; Appearance: White solid; Yield: 90%; MP: 214-217 °C (lit.<sup>1</sup> 216-217 °C); **FT-IR** (neat): 3193, 3054, 2906, 1621, 1327, 1272, 1128  $cm^{-1}$ ; **<sup>1</sup>H NMR** (DMSO- $d_6$ , 400 MHz)  $\delta$  10.51 (brs, 1H), 7.80 (d,  $J = 8.0$  Hz, 3H), 7.60 (d,  $J = 7.6$  Hz, 1H), 7.32 (t,  $J = 8.0$  Hz, 1H), 7.23-7.13 (m, 3H) ppm; **<sup>13</sup>C NMR** (DMSO- $d_6$ , 100 MHz)  $\delta$  161.7, 158.6 (d,  $^1J_{CF} = 237.0$  Hz, 1C), 152.1, 137.1, 130.0, 125.9, 122.4, 121.1, 119.4, 119.2, 115.7 (d,  $^2J_{CF} = 22.2$  Hz, 2C) ppm; **HRMS** (QToF):  $m/z$  calculated for  $C_{13}H_9FN_2S$  ( $[M + H]^+$ ): 245.0549, found: 245.0551.

### 3g. *N*-(3-Fluorophenyl)benzo[*d*]thiazol-2-amine

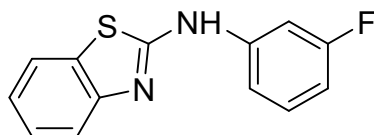

Chemical Formula:  $C_{13}H_9FN_2S$ ; Appearance: White spongy solid; Yield: 87%; MP: 139-142 °C; **FT-IR** (neat): 3190, 3062, 2925, 2233, 1608, 1328, 1275, 1159  $cm^{-1}$ ; **<sup>1</sup>H NMR** (DMSO- $d_6$ , 400 MHz)  $\delta$  10.74 (brs, 1H), 7.93 (d,  $J = 12.0$  Hz, 1H), 7.84 (d,  $J = 7.6$  Hz, 1H), 7.67 (d,  $J = 8.0$  Hz, 1H), 7.43-7.32 (m, 3H), 7.18 (t,  $J = 7.6$  Hz, 1H), 6.83 (t,  $J = 8.4$  Hz, 1H) ppm; **<sup>13</sup>C NMR** (DMSO- $d_6$ , 100 MHz)  $\delta$  163.8 (d,  $^1J_{CF} = 239.7$  Hz, 1C), 161.3, 151.9, 142.3 (d,  $^3J_{CF} = 11.2$  Hz, 1C), 130.7 (d,  $^3J_{CF} = 9.6$  Hz, 1C), 130.0, 126.1, 122.7, 121.2, 119.6, 113.6, 108.4 (d,  $^2J_{CF} = 21.1$  Hz, 1C), 104.7 (d,  $^2J_{CF} = 26.6$  Hz, 1C) ppm; **HRMS** (QToF):  $m/z$  calculated for  $C_{13}H_9FN_2S$  ( $[M + H]^+$ ): 245.0549, found: 245.0547.

### 3h. *N*-(2-Chlorophenyl)benzo[*d*]thiazol-2-amine



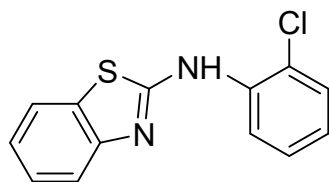

Chemical Formula:  $C_{13}H_9ClN_2S$ ; Appearance: White powder; Yield: 40%; MP: 121-124 °C, (lit.<sup>2</sup> 123-126 °C); **FT-IR** (neat): 3101, 3063, 2239, 1575, 1287, 1110, 1031  $cm^{-1}$ ; **<sup>1</sup>H NMR** ( $CDCl_3$ , 400 MHz)  $\delta$  7.61-7.53 (m, 2H), 7.40 (d,  $J = 7.6$ Hz, 2H), 7.19-7.07 (m, 3H), 6.92 (brs, 1H), 6.55 (d,  $J = 7.2$  Hz, 1H) ppm; **<sup>13</sup>C NMR** ( $CDCl_3$ , 100 MHz)  $\delta$  140.3, 138.1, 134.4, 132.5, 131.7, 130.0, 127.8, 127.4, 126.9, 124.5, 115.9, 115.5, 109.9 ppm; **HRMS** (QToF):  $m/z$  calculated for  $C_{13}H_9ClN_2S$  ( $[M + H]^+$ ): 261.0253, found: 261.0246.

### 3i. *N*-(2-Fluorophenyl)benzo[*d*]thiazol-2-amine

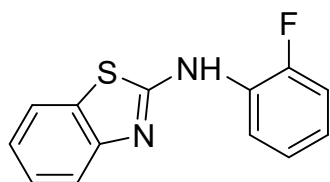

Chemical Formula:  $C_{13}H_9FN_2S$ ; Appearance: White crystals; Yield: 30%; MP: 122-124 °C; **FT-IR** (neat): 3196, 3060, 2915, 1616, 1318, 1285, 1124, 1066  $cm^{-1}$ ; **<sup>1</sup>H NMR** ( $CDCl_3$ , 400 MHz)  $\delta$  8.31 (t,  $J = 8.0$  Hz, 1H), 7.71-7.65 (m, 2H), 7.38 (t,  $J = 7.6$  Hz, 1H), 7.23-7.05 (m, 4H) ppm; **<sup>13</sup>C NMR** ( $CDCl_3$ , 100 MHz)  $\delta$  162.4, 153.9 (d,  $^1J_{CF} = 242.2$  Hz, 1C), 151.2, 130.1, 128.2 (d,  $^3J_{CF} = 9.6$  Hz, 1C), 126.4, 124.9 (d,  $^4J_{CF} = 3.4$  Hz, 1C), 124.0 (d,  $^3J_{CF} = 7.2$  Hz, 1C), 123.2, 121.0, 120.5, 120.1, 115.5 (d,  $^2J_{CF} = 18.7$  Hz, 1C) ppm; **HRMS** (QToF):  $m/z$  calculated for  $C_{13}H_9FN_2S$  ( $[M + H]^+$ ): 245.0549, found: 245.0543.

### 3j. *N*-(*o*-Tolyl)benzo[*d*]thiazol-2-amine

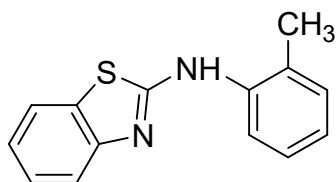

Chemical Formula:  $C_{14}H_{12}N_2S$ ; Appearance: White crystals; Yield: 49%; MP: 118-120 °C; **FT-IR** (neat): 3065, 2917, 2849, 2236, 1642, 1377, 1287, 1127, 1055  $cm^{-1}$ ; **<sup>1</sup>H NMR**

(CDCl<sub>3</sub>, 400 MHz)  $\delta$  7.53-7.48 (m, 2H), 7.38 (d,  $J$  = 8.4 Hz, 1H), 7.20 (d,  $J$  = 7.2 Hz, 1H), 7.15-7.08 (m, 2H), 7.04 (t,  $J$  = 7.6 Hz, 1H), 6.87 (brs, 1H), 6.58 (d,  $J$  = 8.0 Hz, 1H), 2.42 (s, 3H) ppm; <sup>13</sup>C NMR (CDCl<sub>3</sub>, 100 MHz)  $\delta$  139.7, 137.4, 135.7, 134.0, 131.7, 130.7, 127.1, 126.4, 125.9, 124.4, 117.0, 115.3, 110.1, 20.2 ppm; HRMS (QToF):  $m/z$  calculated for C<sub>14</sub>H<sub>12</sub>N<sub>2</sub>S ([M + H]<sup>+</sup>): 241.0799, found: 241.0794.

### 3k. *N*-(4-Methoxyphenyl)benzo[*d*]thiazol-2-amine

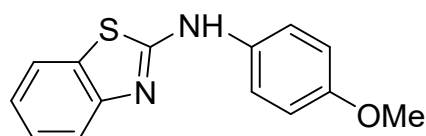

Chemical Formula: C<sub>14</sub>H<sub>12</sub>N<sub>2</sub>OS; Appearance: White solid with purple shade; Yield: 45%; MP: 152-155 °C (lit.<sup>1</sup> 153-155 °C); FT-IR (neat): 3179, 3026, 2833, 1617, 1313, 1265, 1166, 1035 cm<sup>-1</sup>; <sup>1</sup>H NMR (CDCl<sub>3</sub>, 400 MHz)  $\delta$  9.66 (brs, 1H), 7.58 (d,  $J$  = 8.0 Hz, 1H), 7.43 (d,  $J$  = 8.8 Hz, 3H), 7.27 (t,  $J$  = 8.0 Hz, 1H), 7.10 (t,  $J$  = 8.0 Hz, 1H), 6.98 (d,  $J$  = 8.8 Hz, 2H), 3.85 (s, 3H) ppm; <sup>13</sup>C NMR (CDCl<sub>3</sub>, 100 MHz)  $\delta$  167.7, 157.5, 151.7, 133.1, 129.7, 126.1, 124.4, 121.9, 120.9, 118.8, 114.9, 55.6 ppm; HRMS (QToF):  $m/z$  calculated for C<sub>14</sub>H<sub>12</sub>N<sub>2</sub>OS ([M + H]<sup>+</sup>): 257.0749, found: 257.0745.

### 6a. 6-Methyl-*N*-phenylbenzo[*d*]thiazol-2-amine

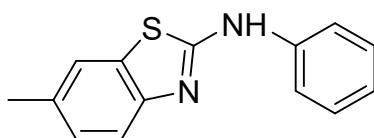

Chemical Formula: C<sub>14</sub>H<sub>12</sub>N<sub>2</sub>S; Appearance: White solid; Yield: 67%; MP: 163-166 °C (lit.<sup>1</sup> 165-167 °C); FT-IR (neat): 3190, 3053, 2938, 1620, 1301, 1268, 1134, 1029 cm<sup>-1</sup>; <sup>1</sup>H NMR (CDCl<sub>3</sub>, 400 MHz)  $\delta$  9.16 (brs, 1H), 7.50-7.38 (m, 6H), 7.18-7.13 (m, 2H), 2.42 (s, 3H) ppm; <sup>13</sup>C NMR (CDCl<sub>3</sub>, 100 MHz)  $\delta$  164.3, 149.2, 140.1, 132.2, 129.9, 129.6, 127.4, 124.2, 120.9, 120.2, 118.9, 21.4 ppm; HRMS (QToF):  $m/z$  calculated for C<sub>14</sub>H<sub>12</sub>N<sub>2</sub>S ([M + H]<sup>+</sup>): 241.0799, found: 241.0790.

### 6b. 6-Methyl-*N*-(3-nitrophenyl)benzo[*d*]thiazol-2-amine

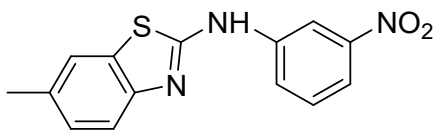

Chemical Formula:  $C_{14}H_{11}N_3O_2S$ ; Appearance: Yellow powder; Yield: 65%; MP: 194-196 °C (lit.<sup>2</sup> 195-197 °C); **FT-IR** (neat): 3185, 3086, 2919, 1619, 1330, 1279, 1134, 1091  $cm^{-1}$ ; **<sup>1</sup>H NMR** (DMSO- $d_6$ , 400 MHz)  $\delta$  10.98 (brs, 1H), 8.85 (t,  $J = 2.4$  Hz, 1H), 8.07 (d,  $J = 8.4$  Hz, 1H), 7.84 (d,  $J = 8.0$  Hz, 1H), 7.63-7.59 (m, 2H), 7.55 (d,  $J = 8.4$  Hz, 1H), 7.17 (d,  $J = 8.4$  Hz, 1H), 2.36 (s, 3H) ppm; **<sup>13</sup>C NMR** (DMSO- $d_6$ , 100 MHz)  $\delta$  160.3, 149.5, 148.3, 141.7, 132.2, 130.2, 130.1, 127.2, 123.5, 121.1, 119.4, 116.1, 111.5, 20.9 ppm; **HRMS** (QToF):  $m/z$  calculated for  $C_{14}H_{11}N_3O_2S$  ( $[M + H]^+$ ): 286.0650, found: 286.0655.

#### 6c. 6-Methyl-*N*-(4-(trifluoromethyl)phenyl)benzo[*d*]thiazol-2-amine

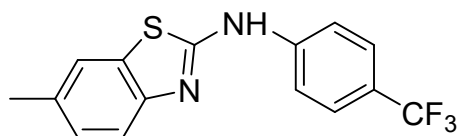

Chemical Formula:  $C_{15}H_{11}F_3N_2S$ ; Appearance: White crystals; Yield: 62%; MP: 198-200 °C; **FT-IR** (neat): 3181, 3041, 2921, 1609, 1320, 1203, 1159, 1012  $cm^{-1}$ ; **<sup>1</sup>H NMR** (DMSO- $d_6$ , 400 MHz)  $\delta$  10.83 (brs, 1H), 7.99 (d,  $J = 8.4$  Hz, 2H), 7.70 (d,  $J = 8.8$  Hz, 2H), 7.61 (s, 1H), 7.55 (d,  $J = 8.0$  Hz, 1H), 7.16 (d,  $J = 8.0$  Hz, 1H), 2.35 (s, 3H) ppm; **<sup>13</sup>C NMR** (DMSO- $d_6$ , 100 MHz)  $\delta$  160.3, 149.7, 144.0, 132.2, 130.2, 126.0 (q,  $^1J_{CF} = 270$  Hz, 1C), 127.2, 126.3 (q,  $^4J_{CF} = 4$  Hz, 2C), 121.8 (q,  $^2J_{CF} = 32$  Hz, 1C), 121.0, 119.4, 117.3, 20.9 ppm; **HRMS** (QToF):  $m/z$  calculated for  $C_{15}H_{11}F_3N_2S$  ( $[M + H]^+$ ): 309.0673, found: 309.0695.

#### 6d. *N*-(4-Chlorophenyl)-6-methylbenzo[*d*]thiazol-2-amine

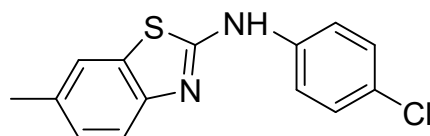

Chemical Formula:  $C_{14}H_{11}ClN_2S$ ; Appearance: White solid; Yield: 89%; MP: 172-174 °C; **FT-IR** (neat): 3177, 3075, 2904, 1619, 1301, 1248, 1174, 1014  $cm^{-1}$ ; **<sup>1</sup>H NMR** (DMSO- $d_6$ , 400 MHz)  $\delta$  10.55 (brs, 1H), 7.83-7.80 (m, 2H), 7.61 (d,  $J = 7.2$  Hz, 1H), 7.51 (d,  $J = 8.4$  Hz, 1H), 7.41 (d,  $J = 8.8$  Hz, 2H), 7.15 (d,  $J = 8.0$  Hz, 1H), 2.35 (s, 3H) ppm; **<sup>13</sup>C NMR** (DMSO-

d<sub>6</sub>, 100 MHz)  $\delta$  160.5, 149.8, 139.6, 131.8, 130.1, 128.8, 127.1, 125.2, 121.0, 119.0, 20.9 ppm; **HRMS** (QToF):  $m/z$  calculated for C<sub>14</sub>H<sub>11</sub>ClN<sub>2</sub>S ([M + H]<sup>+</sup>): 275.0410, found: 275.0408.

**6e. *N*-(4-Fluorophenyl)-6-methylbenzo[*d*]thiazol-2-amine**

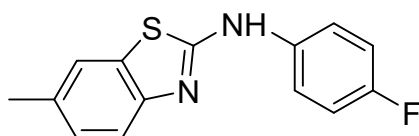

Chemical Formula: C<sub>14</sub>H<sub>11</sub>FN<sub>2</sub>S; Appearance: White solid; Yield: 86%; MP: 175-177 °C; **FT-IR** (neat): 3201, 3044, 2914, 2849, 1621, 1328, 1285, 1133, 1056 cm<sup>-1</sup>; **<sup>1</sup>H NMR** (DMSO-d<sub>6</sub>, 400 MHz)  $\delta$  10.44 (brs, 1H), 7.82-7.79 (m, 2H), 7.56 (s, 1H), 7.48 (d,  $J$  = 8.0 Hz, 1H), 7.19 (t,  $J$  = 8.8 Hz, 2H), 7.12 (d,  $J$  = 8.0 Hz, 1H), 2.34 (s, 3H) ppm; **<sup>13</sup>C NMR** (DMSO-d<sub>6</sub>, 100 MHz)  $\delta$  160.9, 158.5 (d,  $^1J_{CF}$  = 236.9 Hz, 1C), 149.9, 137.3, 131.6, 130.1, 127.0, 120.9, 119.3 (d,  $^3J_{CF}$  = 7.6 Hz, 2C), 118.9, 115.6 (d,  $^2J_{CF}$  = 22.2 Hz, 2C), 20.90 ppm; **HRMS** (QToF):  $m/z$  calculated for C<sub>13</sub>H<sub>9</sub>FN<sub>2</sub>S ([M + H]<sup>+</sup>): 259.0705, found: 259.0704.

**6f. *N*-(3-Fluorophenyl)-6-methylbenzo[*d*]thiazol-2-amine**

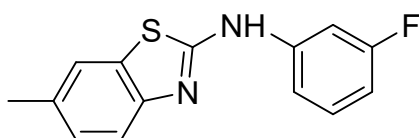

Chemical Formula: C<sub>14</sub>H<sub>11</sub>FN<sub>2</sub>S; Appearance: White spongy solid; Yield: 80%; MP: 168-170 °C; **FT-IR** (neat): 3192, 3064, 2921, 1620, 1336, 1237, 1166, 1003 cm<sup>-1</sup>; **<sup>1</sup>H NMR** (DMSO-d<sub>6</sub>, 400 MHz)  $\delta$  10.66 (brs, 1H), 7.94 (d,  $J$  = 11.6 Hz, 1H), 7.58 (s, 1H), 7.55 (d,  $J$  = 8.0 Hz, 1H), 7.42-7.33 (m, 2H), 7.14 (d,  $J$  = 8.4 Hz, 1H), 6.81 (t,  $J$  = 8.4 Hz, 1H) 2.34 (s, 3H) ppm; **<sup>13</sup>C NMR** (DMSO-d<sub>6</sub>, 100 MHz)  $\delta$  163.7 (d,  $^1J_{CF}$  = 239.5 Hz, 1C), 160.5, 149.8, 142.4 (d,  $^3J_{CF}$  = 11.4 Hz, 1C), 131.9, 130.5 (d,  $^3J_{CF}$  = 9.6 Hz, 1C), 130.0, 127.1, 120.9, 119.2, 113.4, 108.2 (d,  $^2J_{CF}$  = 21.1 Hz, 1C), 104.5 (d,  $^2J_{CF}$  = 26.7 Hz, 1C), 20.8 ppm; **HRMS** (QToF):  $m/z$  calculated for C<sub>14</sub>H<sub>11</sub>FN<sub>2</sub>S ([M + H]<sup>+</sup>): 259.07052, found: 259.07046.

**6g. *N*-(4-Methoxyphenyl)-6-methylbenzo[*d*]thiazol-2-amine**

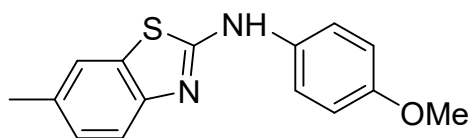

Chemical Formula: C<sub>15</sub>H<sub>14</sub>N<sub>2</sub>OS; Appearance: White crystals; Yield: 41%; MP: 168-170 °C (lit.<sup>2</sup> 167-170 °C); **FT-IR** (neat): 3070, 2904, 1679, 1324, 1267, 1164, 1031 cm<sup>-1</sup>; **<sup>1</sup>H NMR** (CDCl<sub>3</sub>, 400 MHz) δ 7.40-7.35 (m, 4H), 7.10 (d, *J* = 7.2 Hz, 1H), 6.96 (d, *J* = 8.8 Hz, 2H), 6.78 (brs, 1H), 3.84 (s, 3H), 2.39 (s, 3H) ppm; **<sup>13</sup>C NMR** (CDCl<sub>3</sub>, 100 MHz) δ 166.4, 157.2, 149.6, 133.2, 131.8, 129.9, 127.3, 124.0, 120.9, 118.6, 114.8, 55.6, 21.3 ppm; **HRMS** (QToF): *m/z* calculated for C<sub>15</sub>H<sub>14</sub>N<sub>2</sub>OS ([M + H]<sup>+</sup>): 271.0905, found: 271.0908.

#### 8a. *N*-(4-Chlorophenyl)thiazol-2-amine

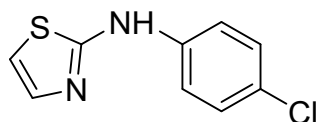

Chemical Formula: C<sub>9</sub>H<sub>7</sub>ClN<sub>2</sub>S; Appearance: Off-white crystals; Yield: 28%; MP: 155-159 °C; **FT-IR** (neat): 3187, 3124, 2917, 1612, 1303, 1206, 1182, 1060 cm<sup>-1</sup>; **<sup>1</sup>H NMR** (DMSO-d<sub>6</sub>, 400 MHz) δ 10.34 (s, 1H), 7.68 (d, *J* = 8.8 Hz, 2H), 7.34 (d, *J* = 8.8 Hz, 2H), 7.26 (d, *J* = 3.6 Hz, 1H), 6.94 (d, *J* = 3.6 Hz, 1H) ppm; **<sup>13</sup>C NMR** (DMSO-d<sub>6</sub>, 100 MHz) δ 163.5, 140.2, 138.8, 128.7, 124.3, 118.2, 108.9 ppm; **GC-MS** (EI): *m/z* calculated for C<sub>9</sub>H<sub>7</sub>ClN<sub>2</sub>S (M<sup>+</sup>): 210, found: 209.9.

## 5. References

1. Q. Ding, B. Cao, X. Liu, Z. Zong, Y. Peng, *Green Chem.* **2010**, *12*, 1607.
2. N. Khatun, L. Jamir, M. Ganesh, B. K. Patel, *RSC Adv.* **2012**, *2*, 11557.

## 6. <sup>1</sup>H and <sup>13</sup>C NMR Spectra of Compounds

### 3a. *N*-Phenylbenzo[*d*]thiazol-2-amine

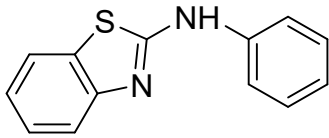

### <sup>1</sup>H NMR of 3a:

RS CN-1

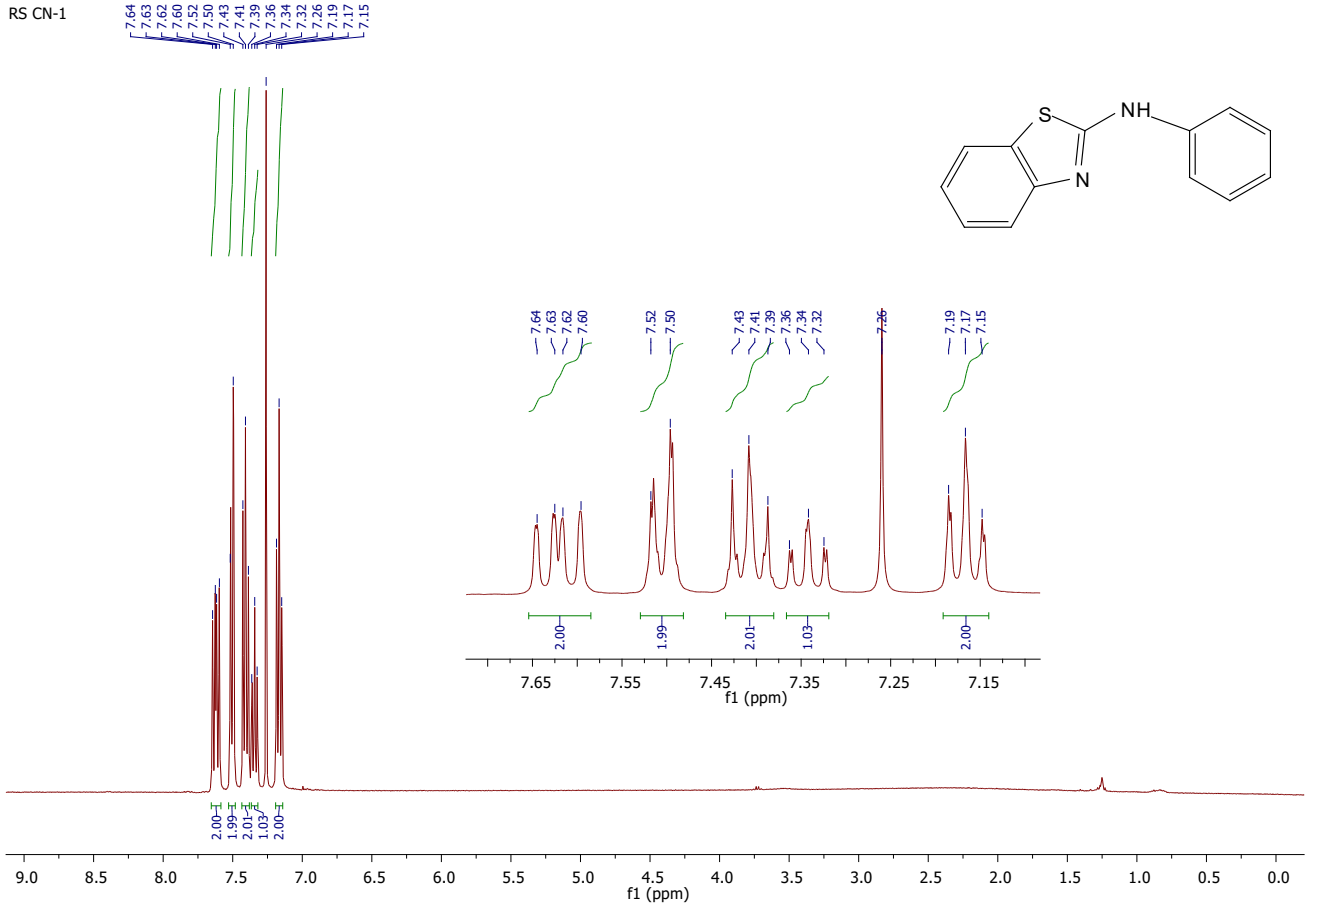

### <sup>13</sup>C NMR of 3a:

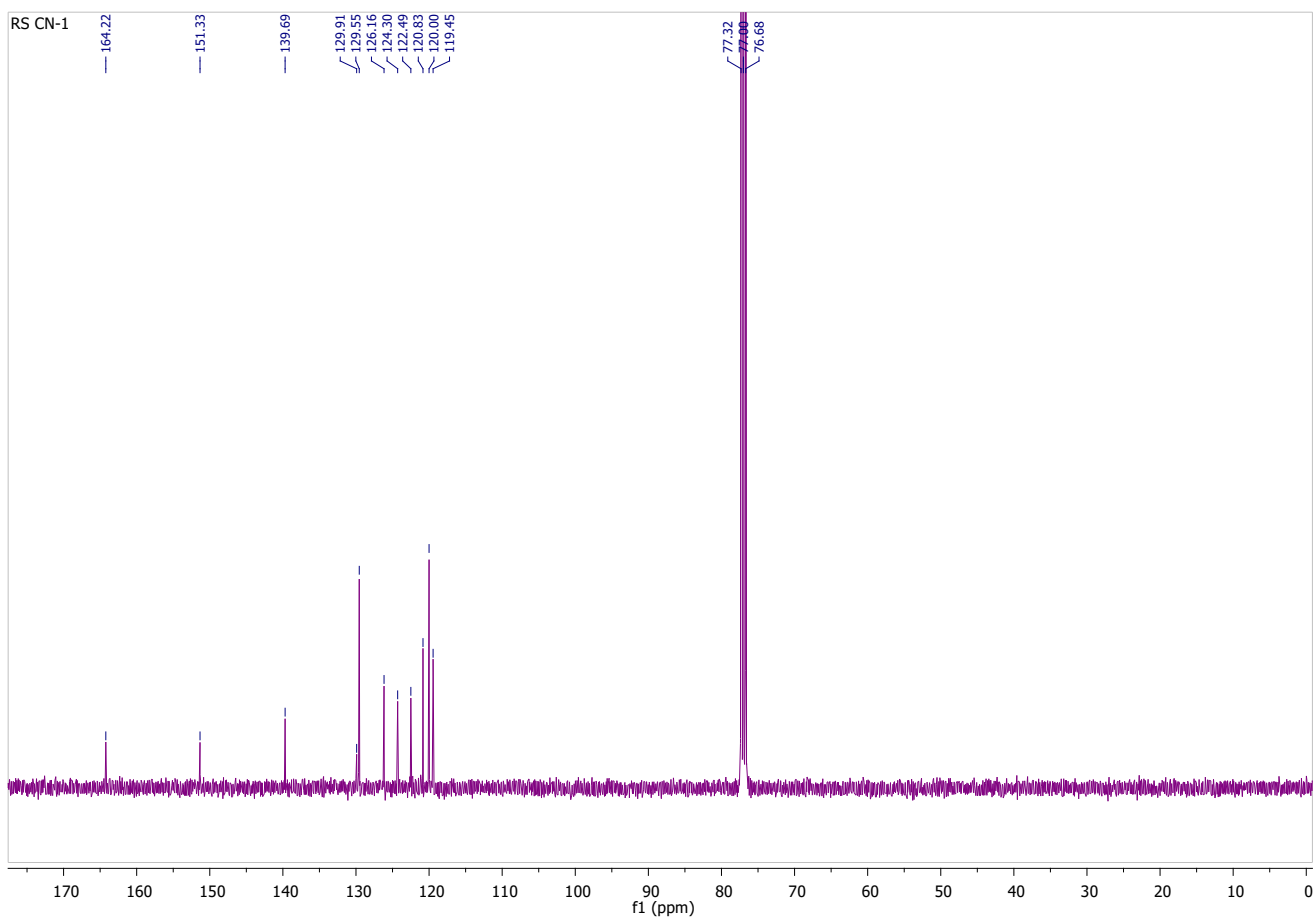

**3b. *N*-(3-Nitrophenyl)benzo[*d*]thiazol-2-amine**

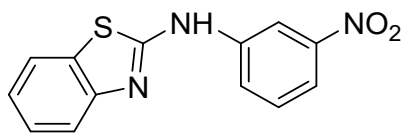

**<sup>1</sup>H NMR of 3b:**

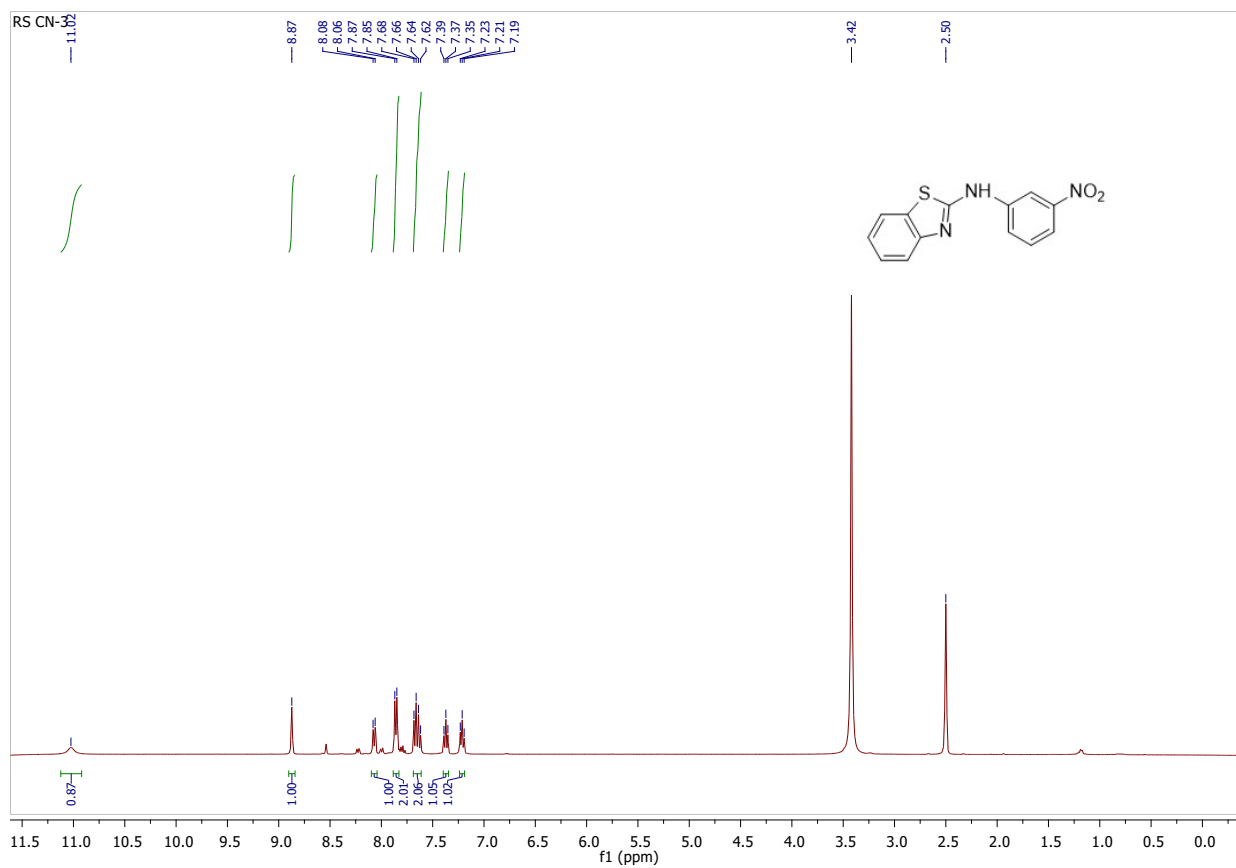

**<sup>13</sup>C NMR of 3b:**



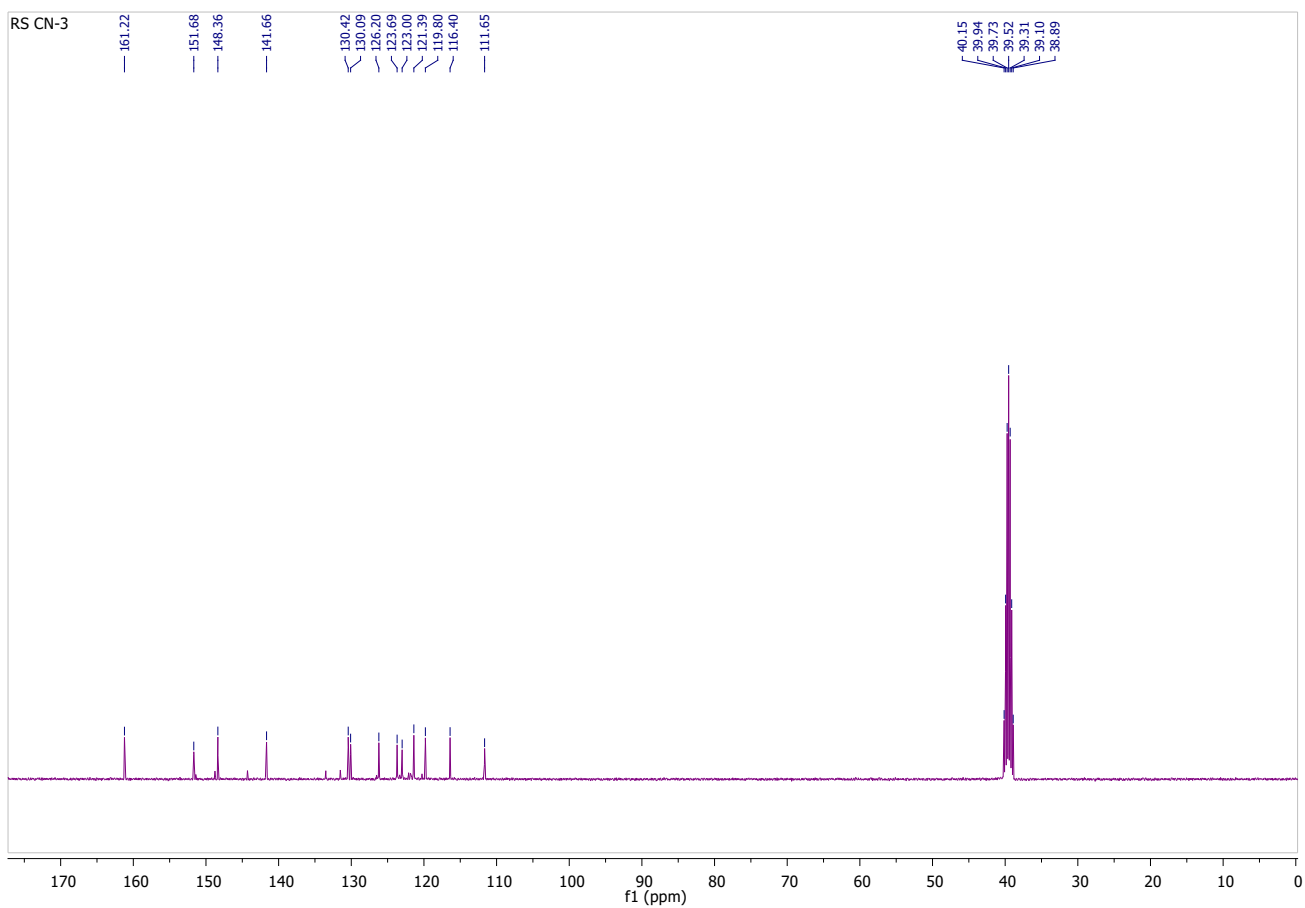

**3c. *N*-(4-(Trifluoromethyl)phenyl)benzo[*d*]thiazol-2-amine**

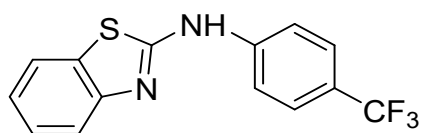

**<sup>1</sup>H NMR of 3c:**

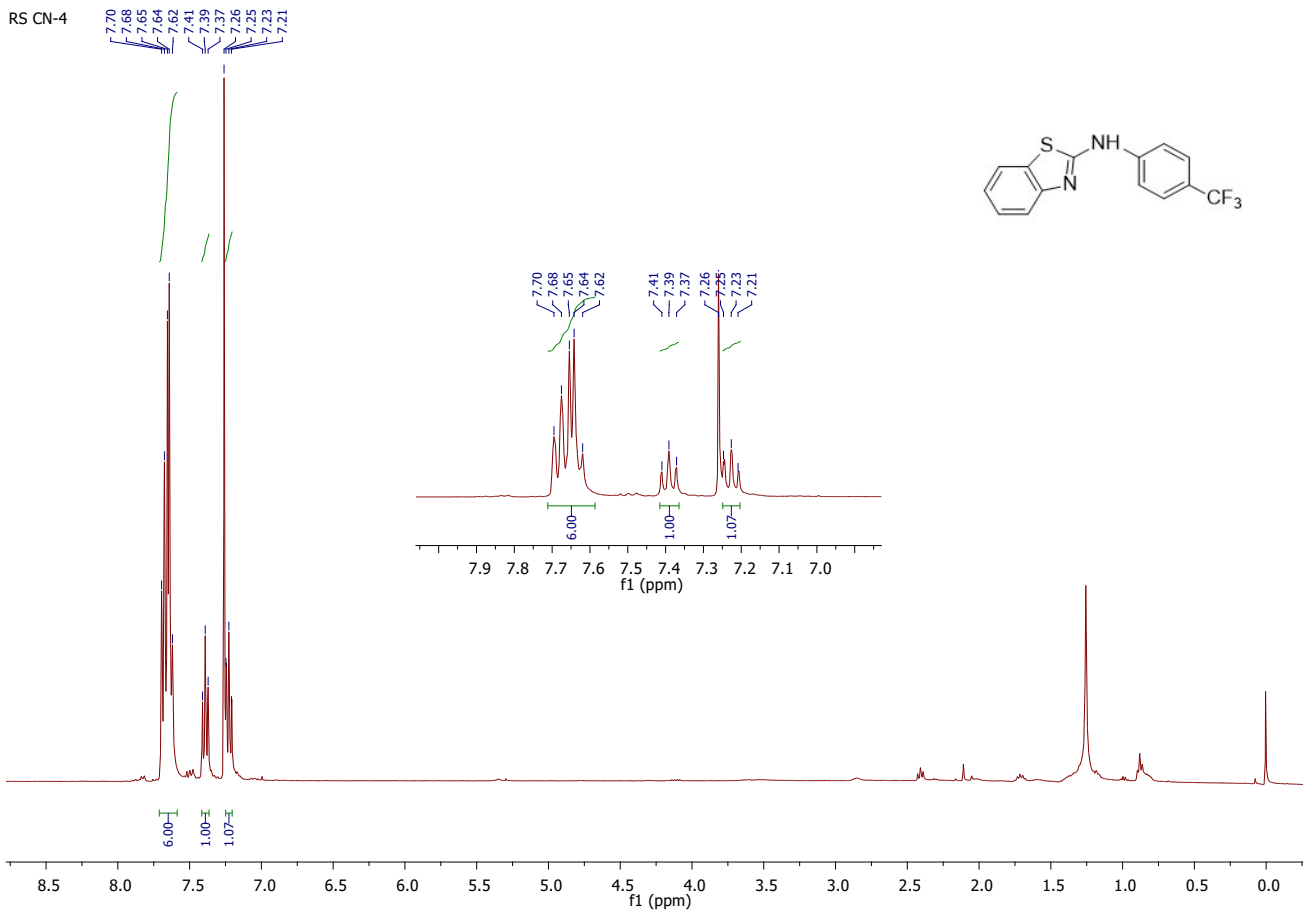

**<sup>13</sup>C NMR of 3c:**

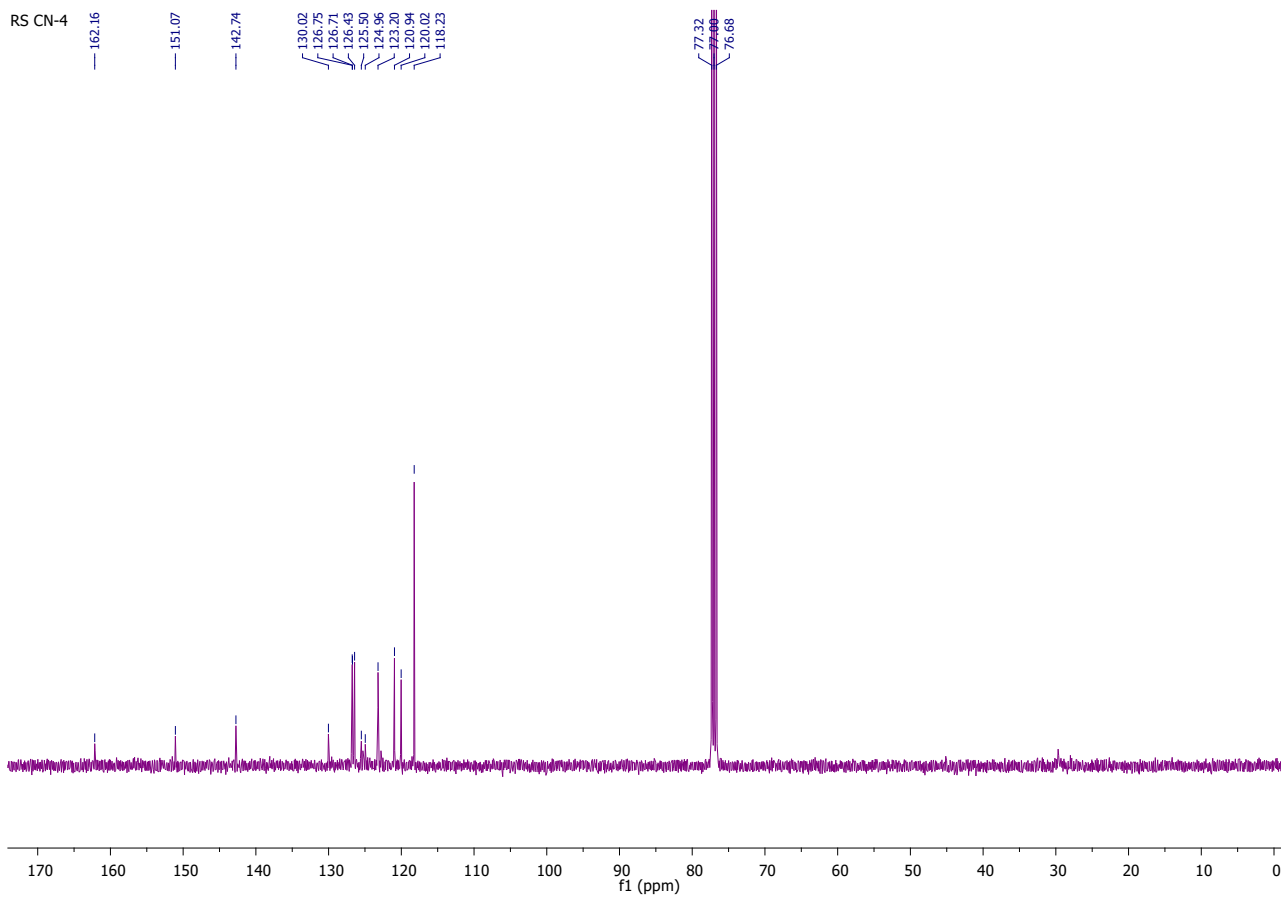

### 3d. *N*-(3-(Trifluoromethyl)phenyl)benzo[*d*]thiazol-2-amine

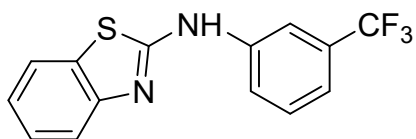

**<sup>1</sup>H NMR of 3d:**

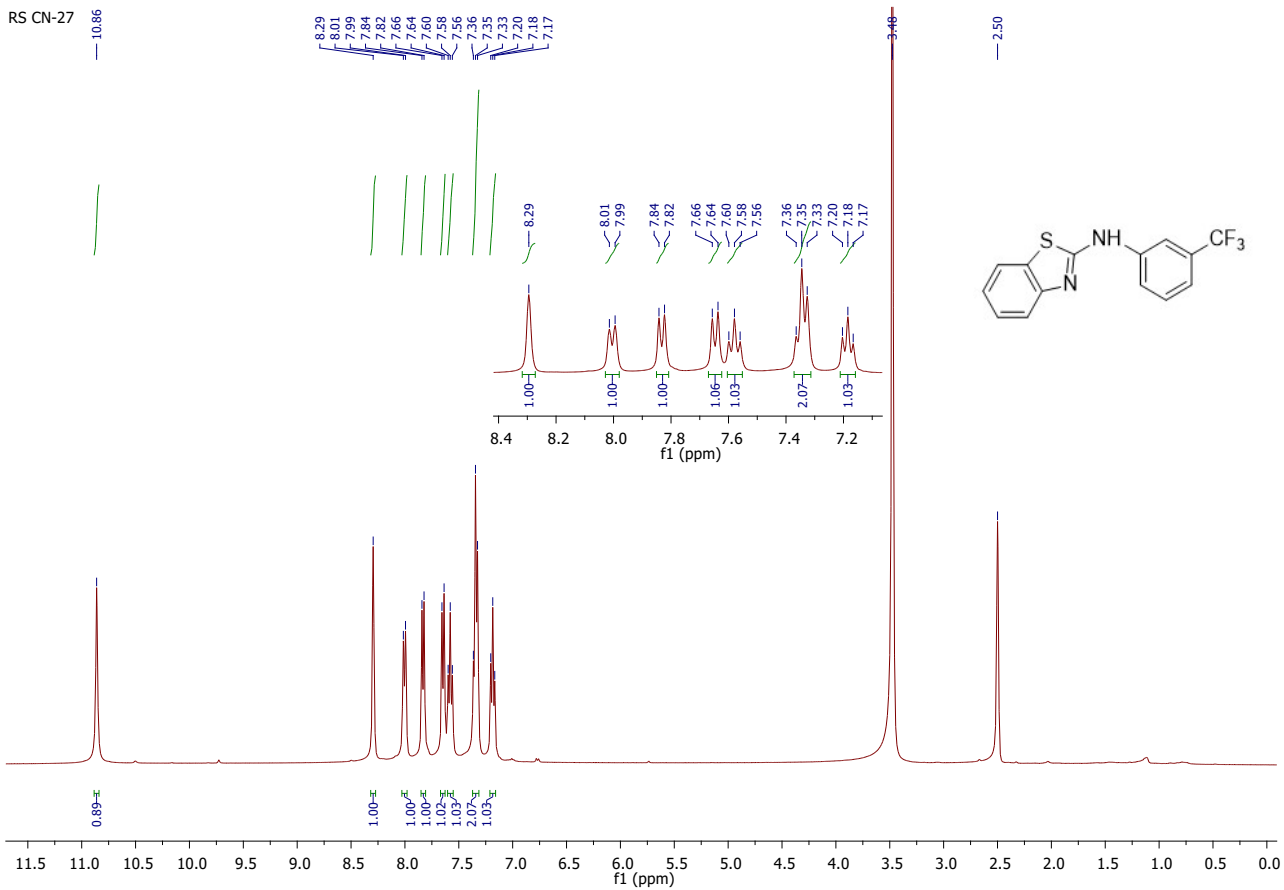

**$^{13}\text{C}$  NMR of 3d:**

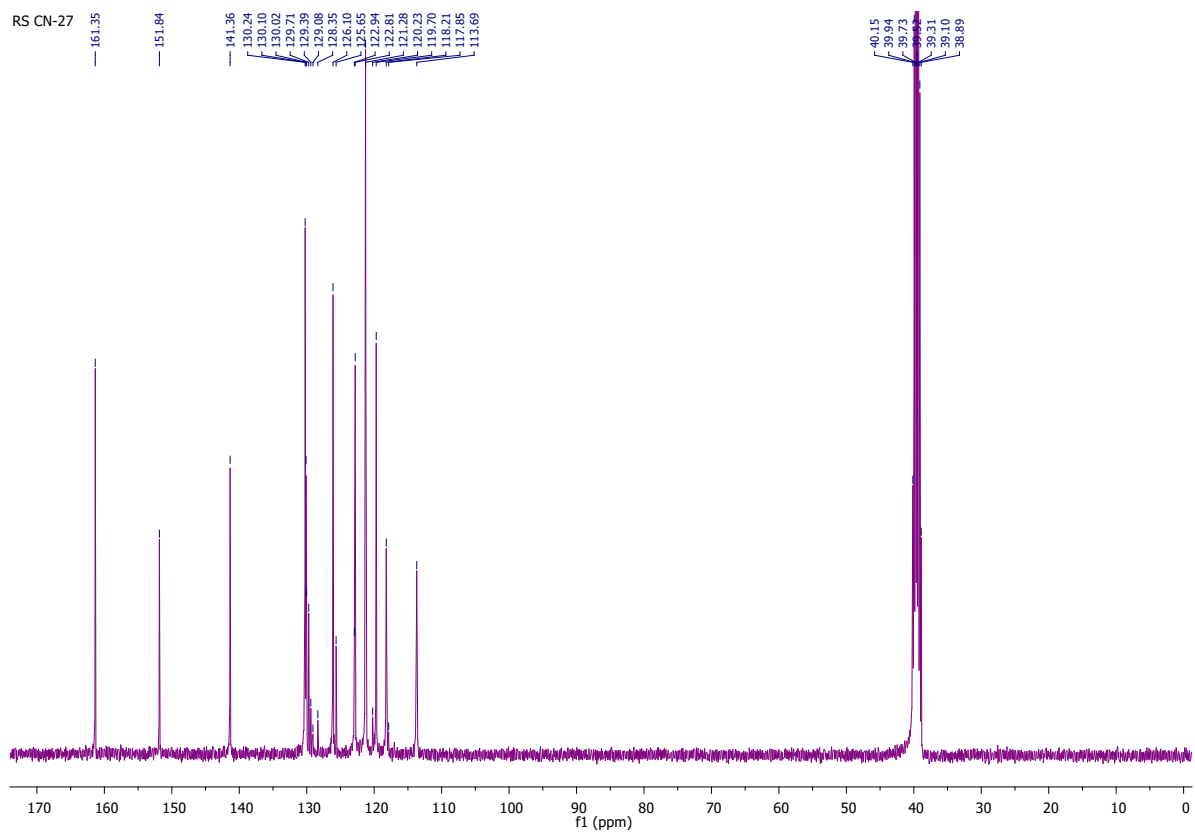

**3e. *N*-(4-Chlorophenyl)benzo[*d*]thiazol-2-amine**

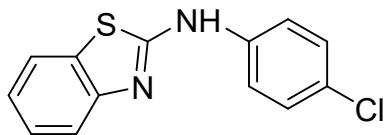

**<sup>1</sup>H NMR of 3e:**

RS CN-10

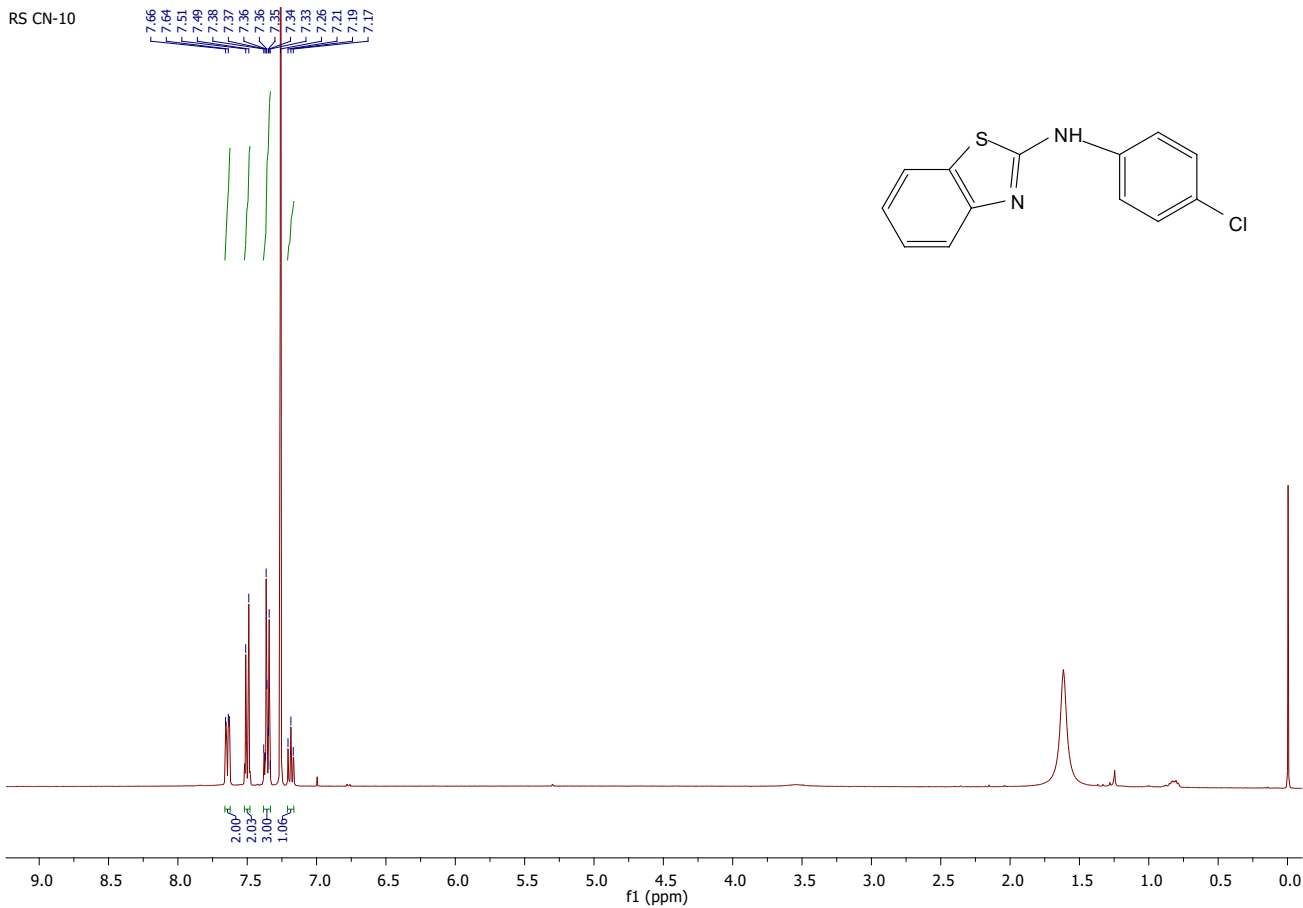

**<sup>13</sup>C NMR of 3e:**

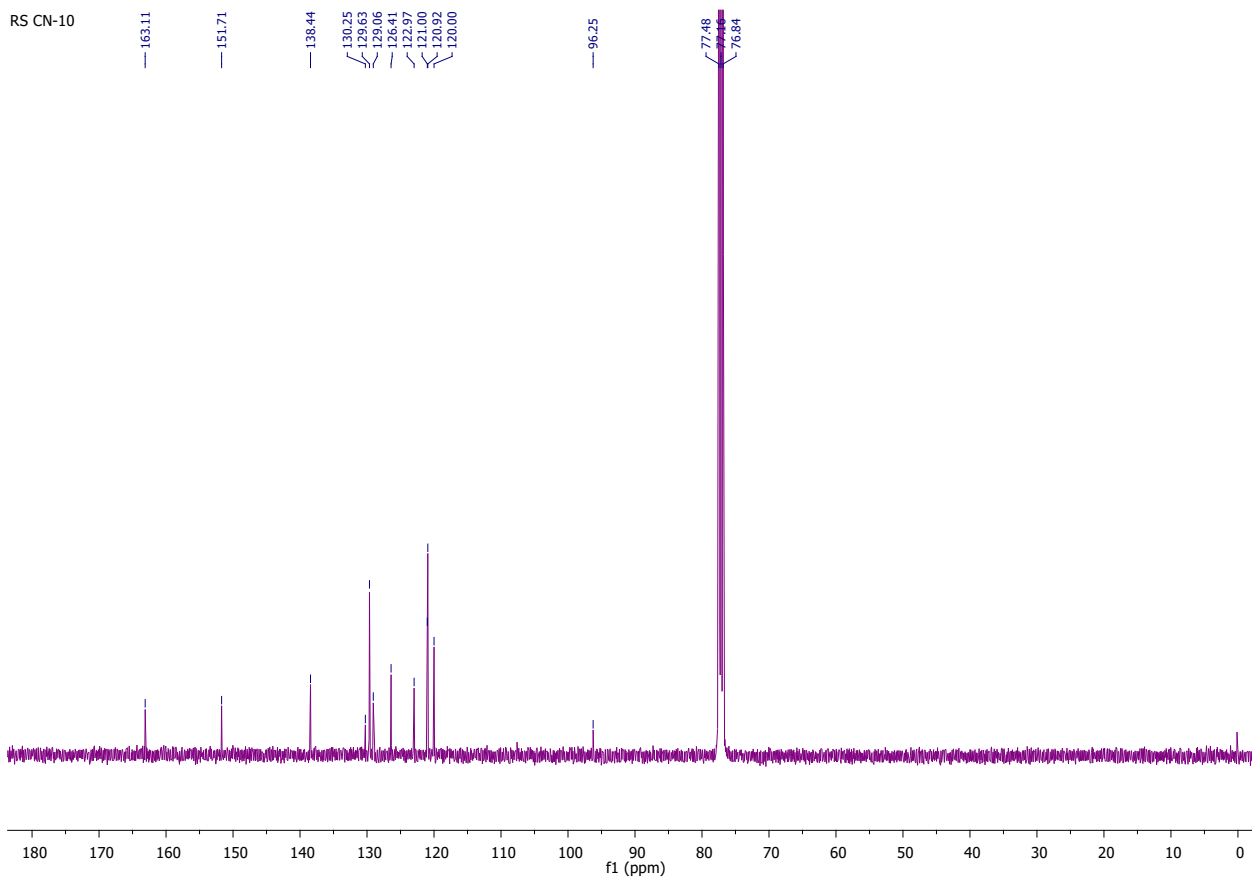

### 3f. *N*-(4-Fluorophenyl)benzo[*d*]thiazol-2-amine

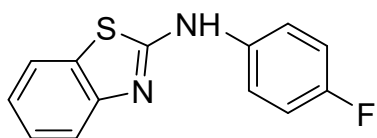

<sup>1</sup>H NMR of 3f:

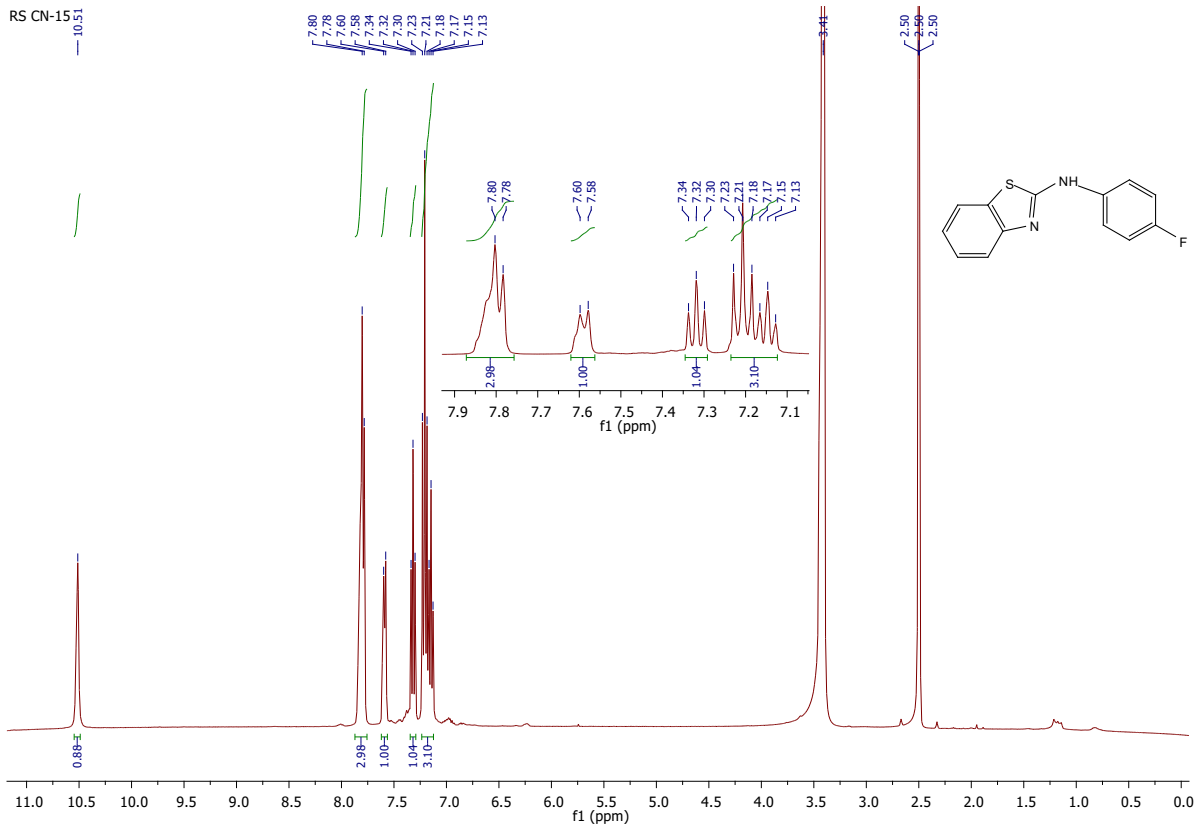

### <sup>13</sup>C NMR of 3f:

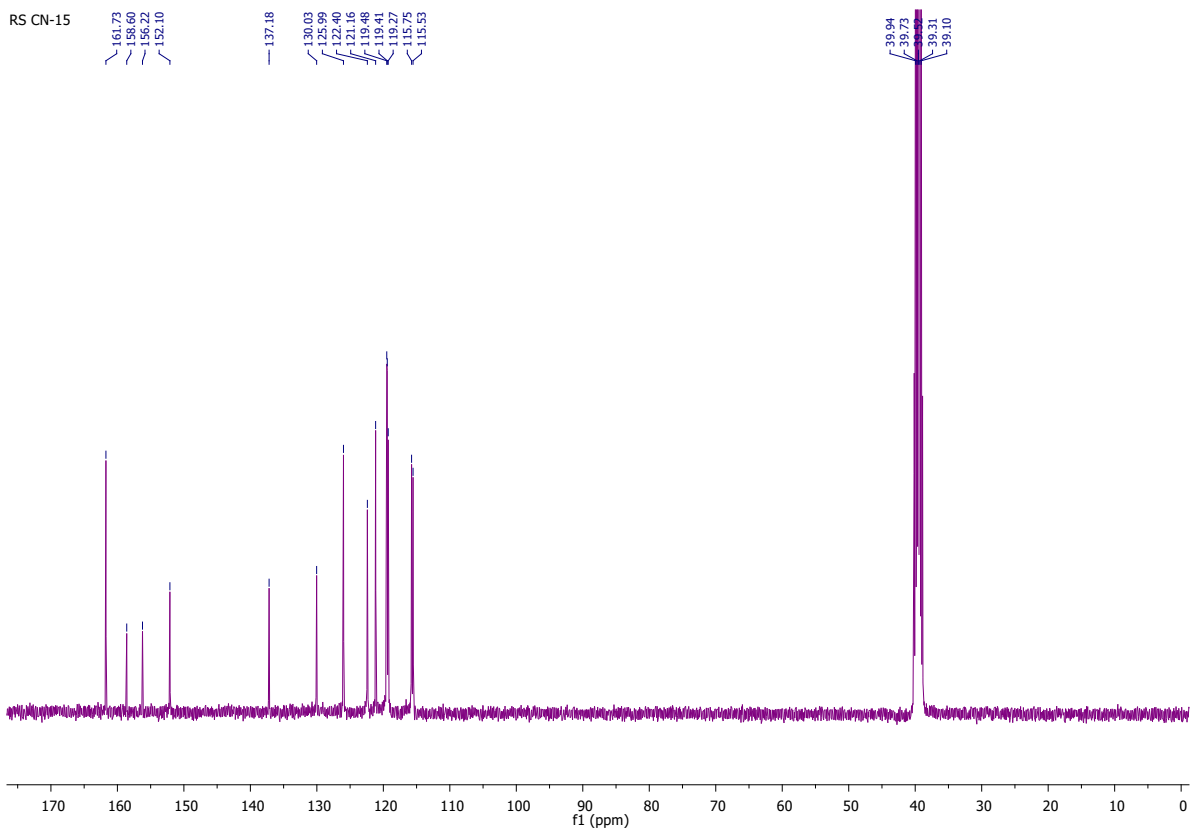



### 3g. *N*-(3-Fluorophenyl)benzo[*d*]thiazol-2-amine

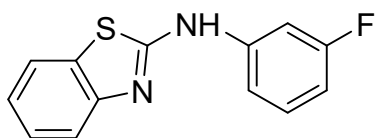

#### <sup>1</sup>H NMR of 3g:

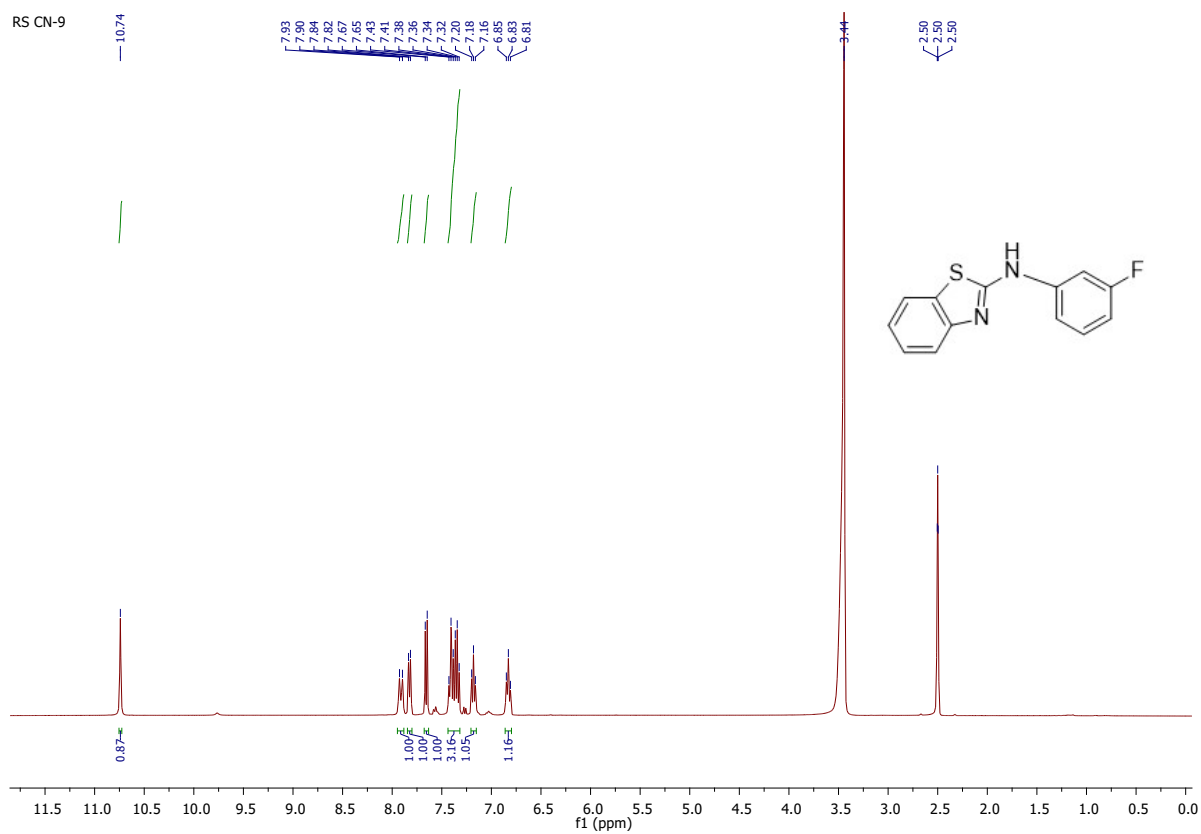

#### <sup>13</sup>C NMR of 3g:

RS CN-9

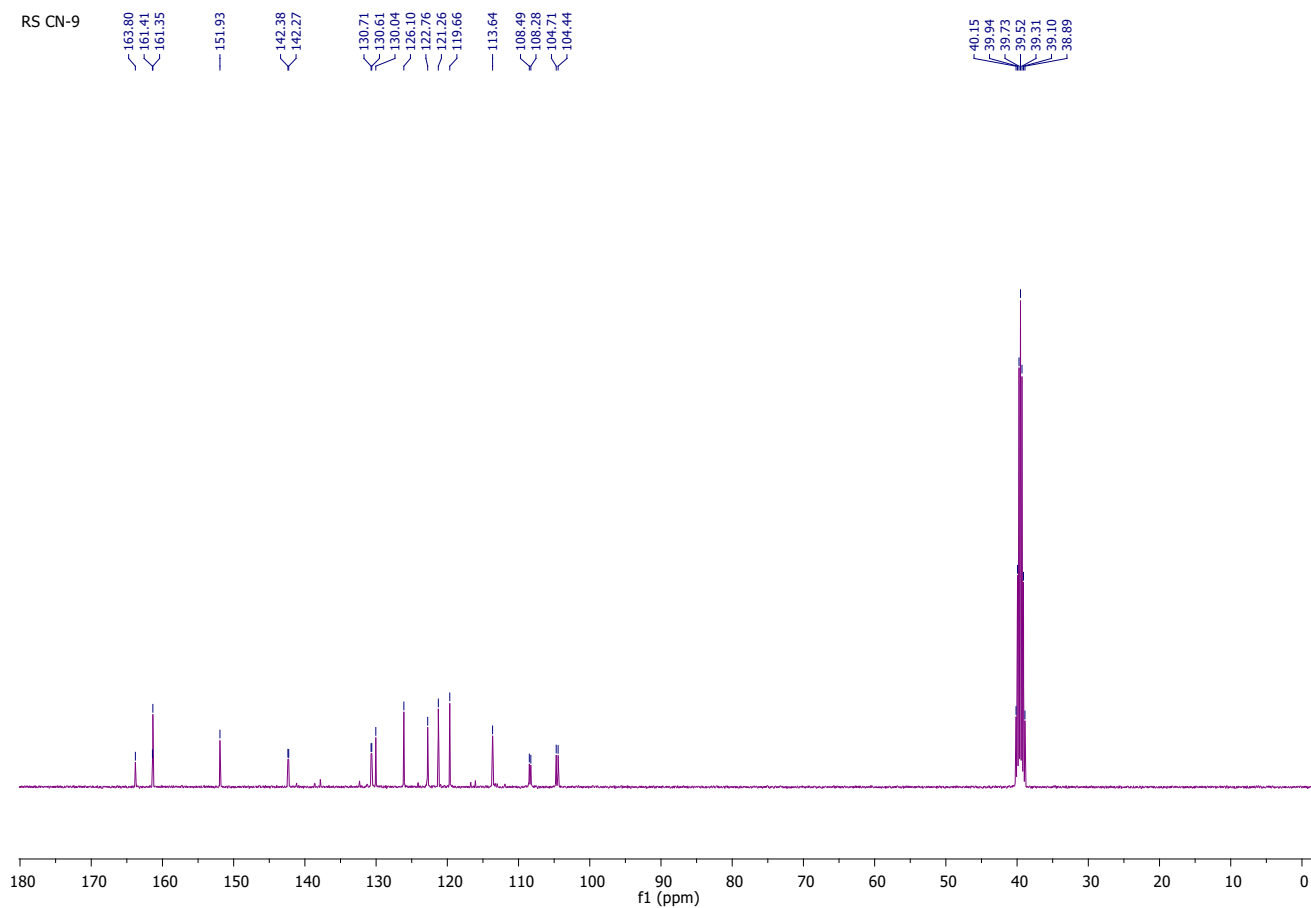

### 3h. *N*-(2-Chlorophenyl)benzo[*d*]thiazol-2-amine

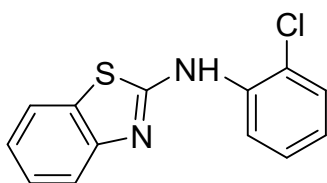

<sup>1</sup>H NMR of 3h:

RS CN-12

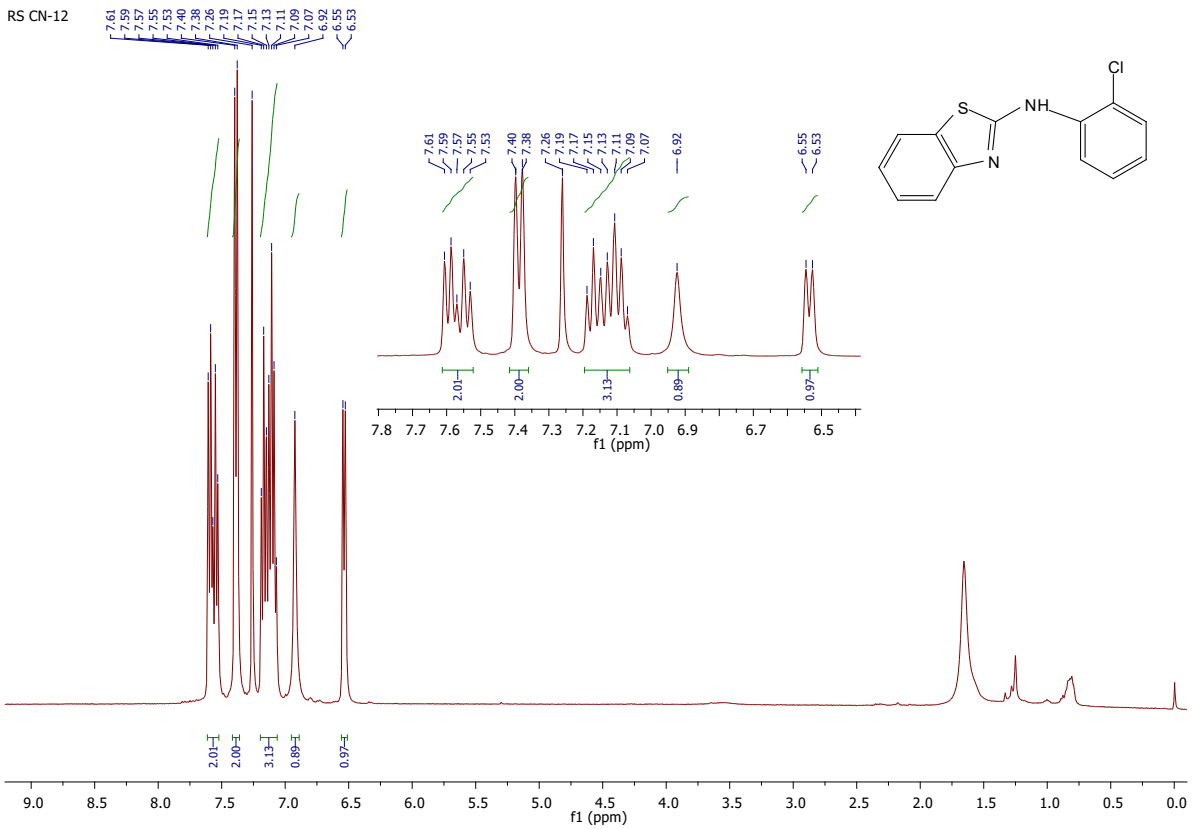

### <sup>13</sup>C NMR of 3h:

RS CN-12

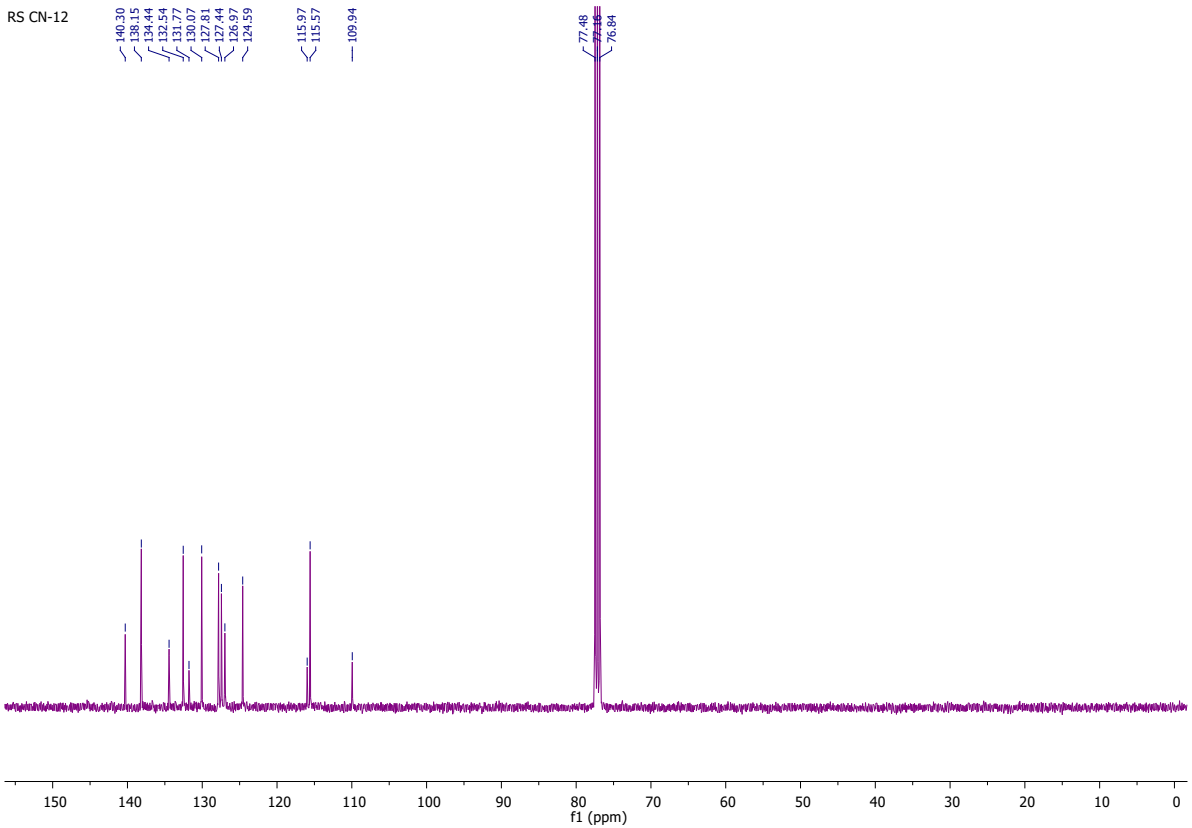

### 3i. *N*-(2-Fluorophenyl)benzo[*d*]thiazol-2-amine

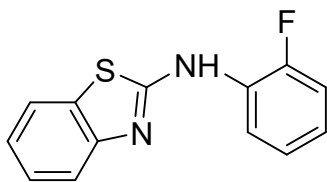

### <sup>1</sup>H NMR of 3i:

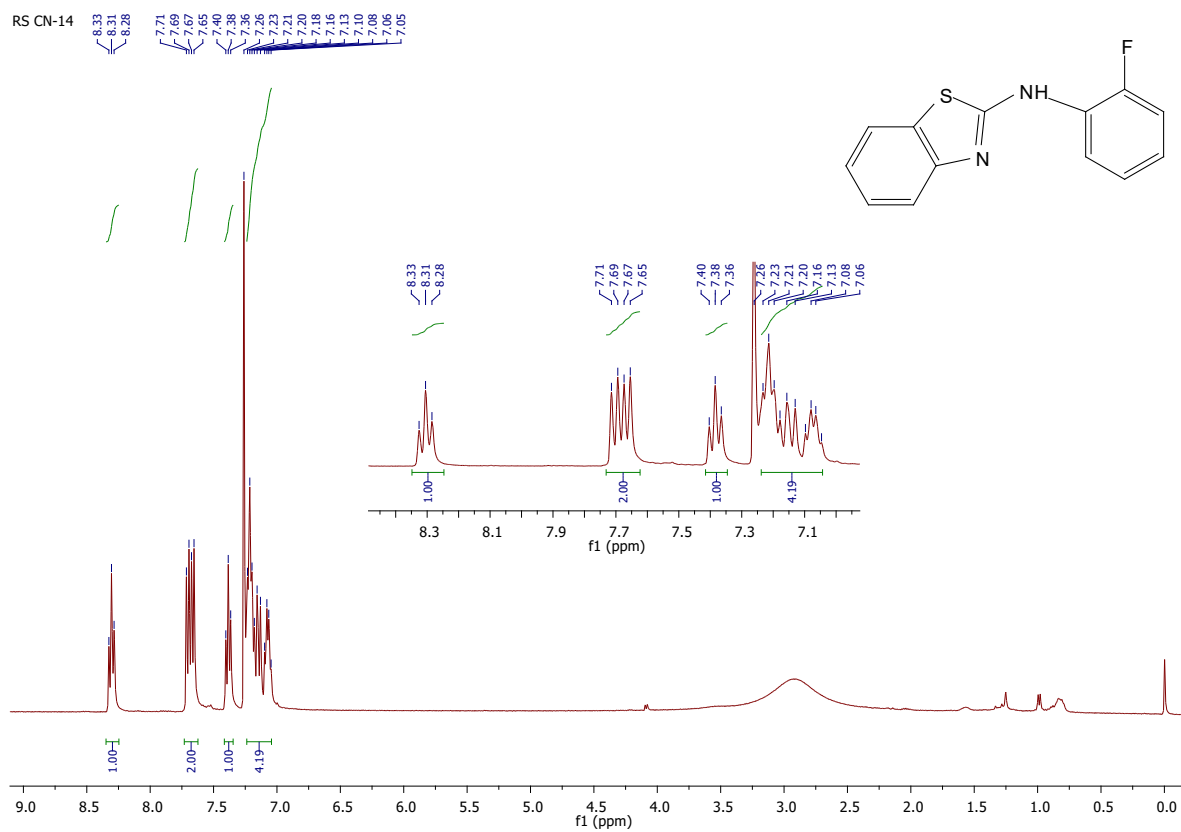

### <sup>13</sup>C NMR of 3i:

RS CN-14

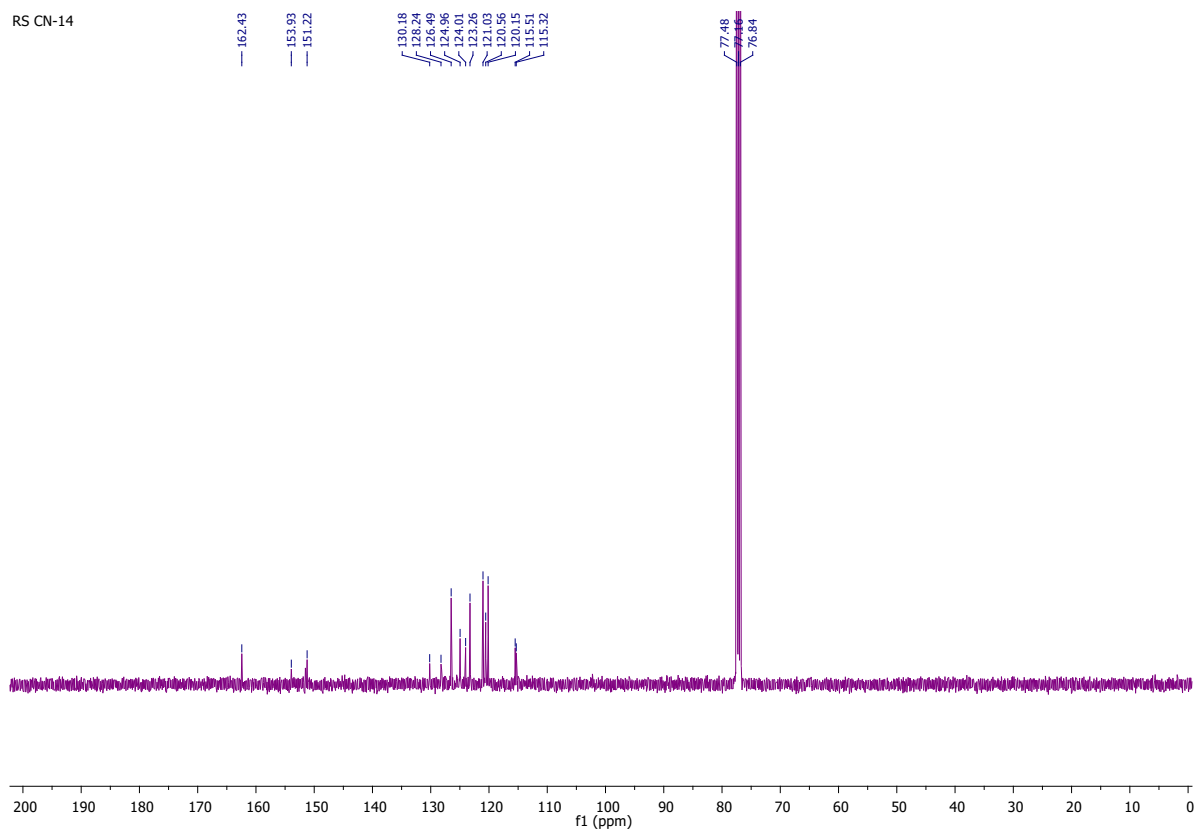

### 3j. *N*-(*o*-Tolyl)benzo[*d*]thiazol-2-amine

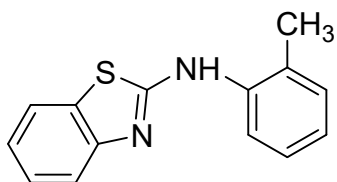

<sup>1</sup>H NMR of 3j:

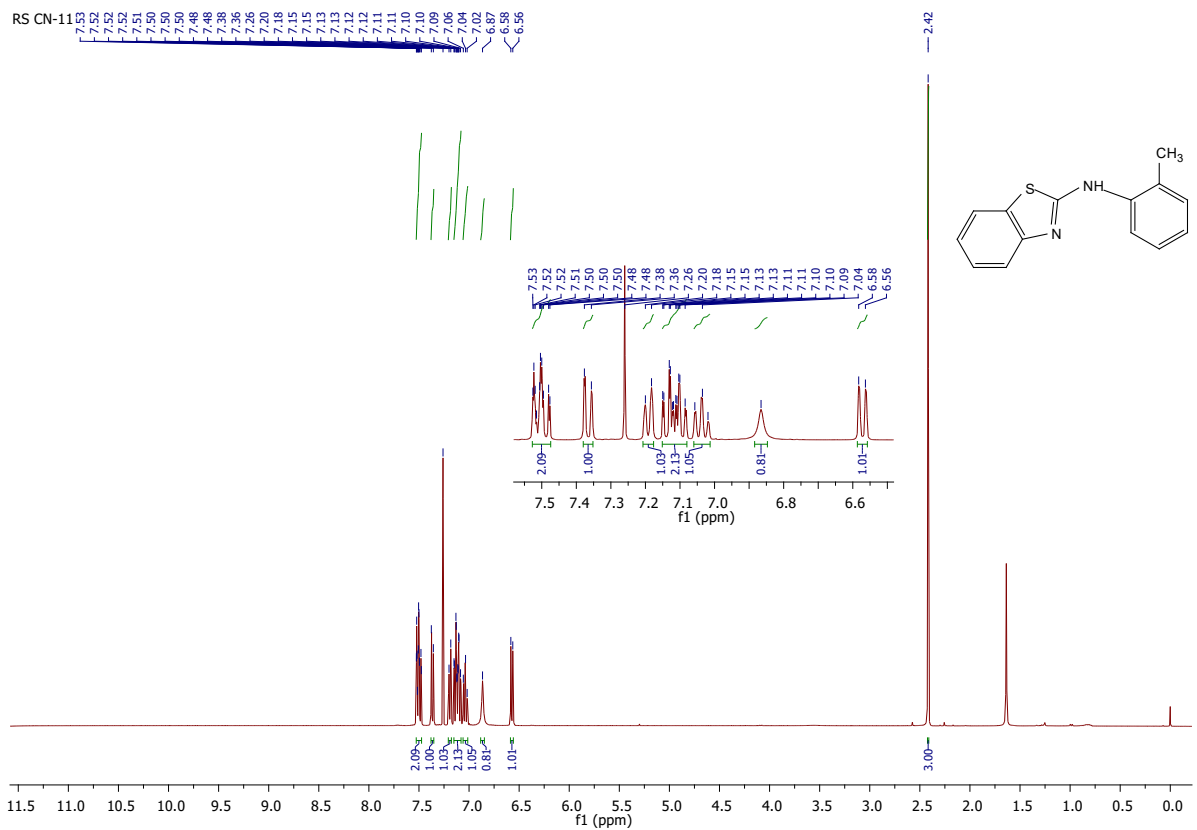

### <sup>13</sup>C NMR of 3j:

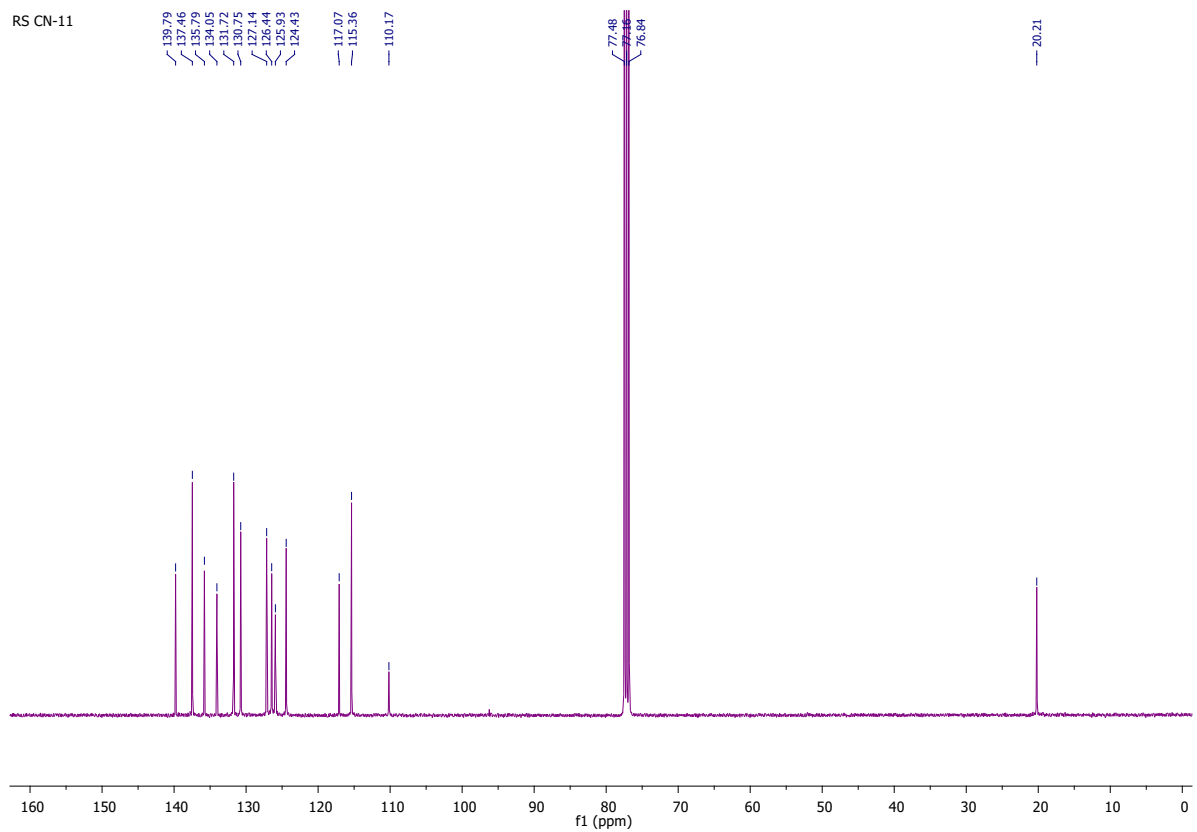

### 3k. *N*-(4-Methoxyphenyl)benzo[*d*]thiazol-2-amine

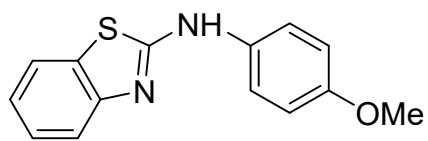

#### <sup>1</sup>H NMR of 3k:

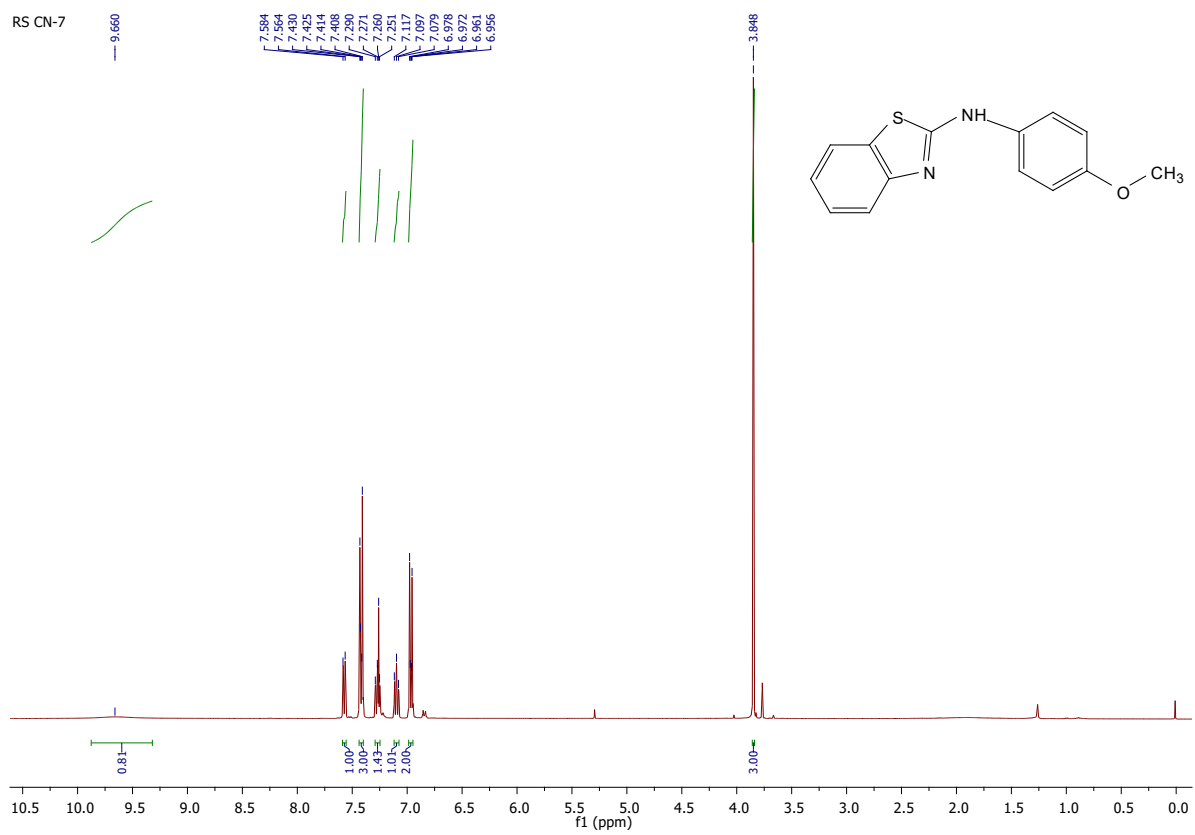

#### <sup>13</sup>C NMR of 3k:

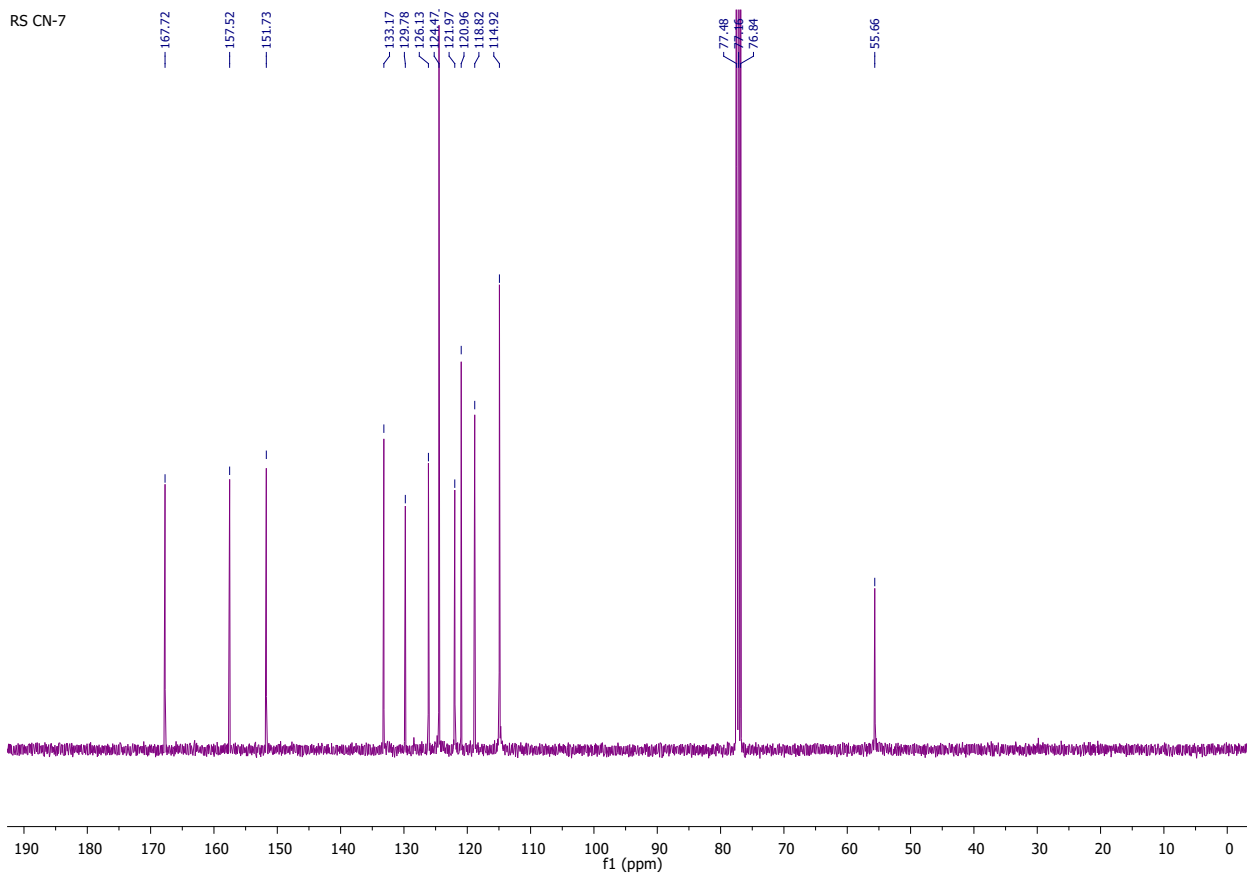

**6a. 6-Methyl-N-phenylbenzo[d]thiazol-2-amine**

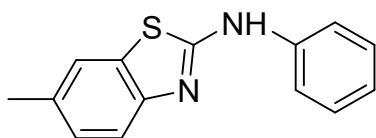

**<sup>1</sup>H NMR of 6a:**



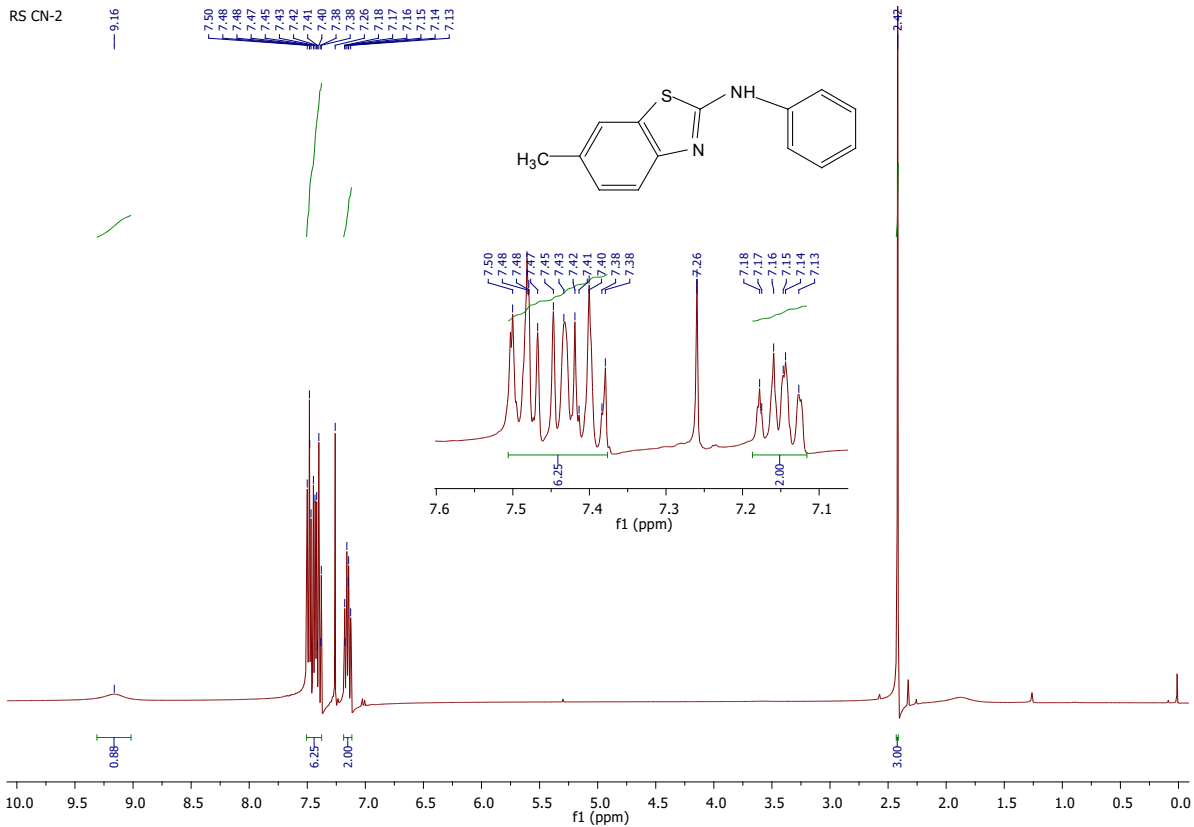

### <sup>13</sup>C NMR of 6a:

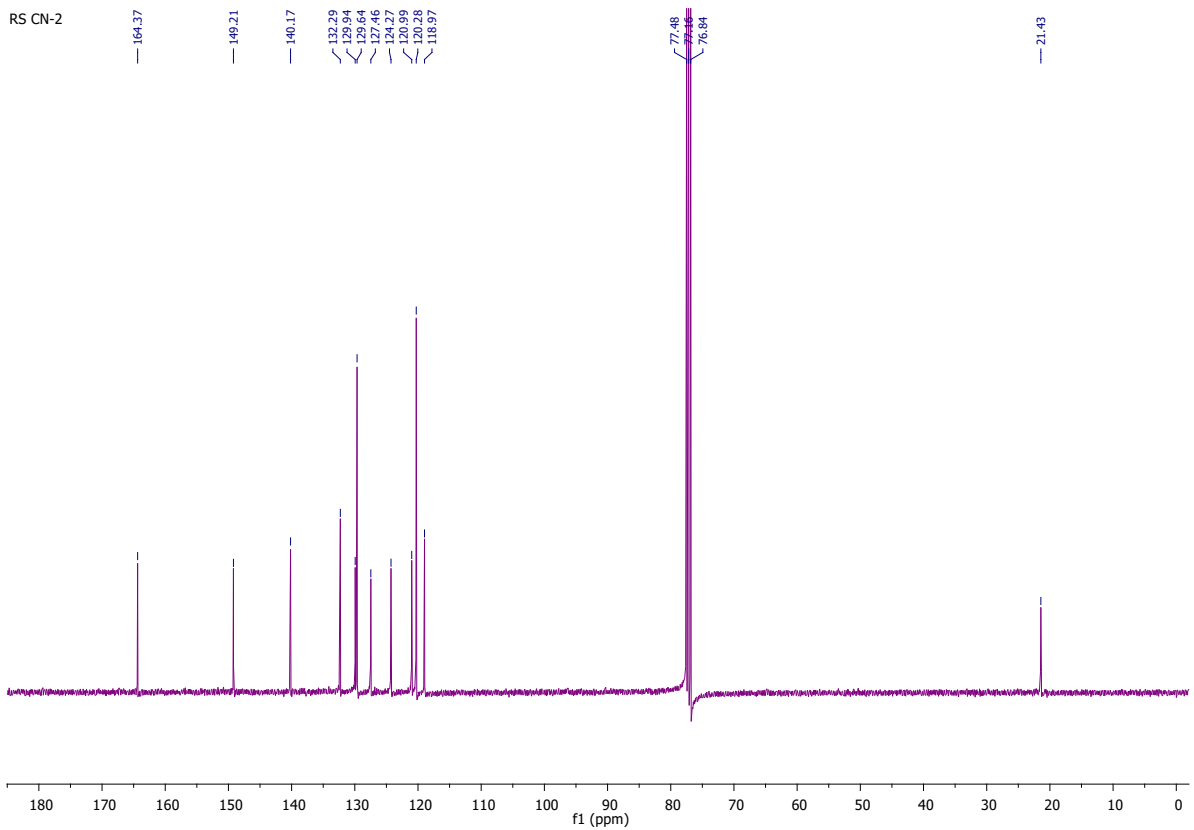

## 6b. 6-Methyl-N-(3-nitrophenyl)benzo[d]thiazol-2-amine

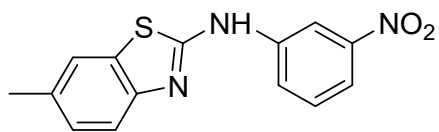

### <sup>1</sup>H NMR of 6b:

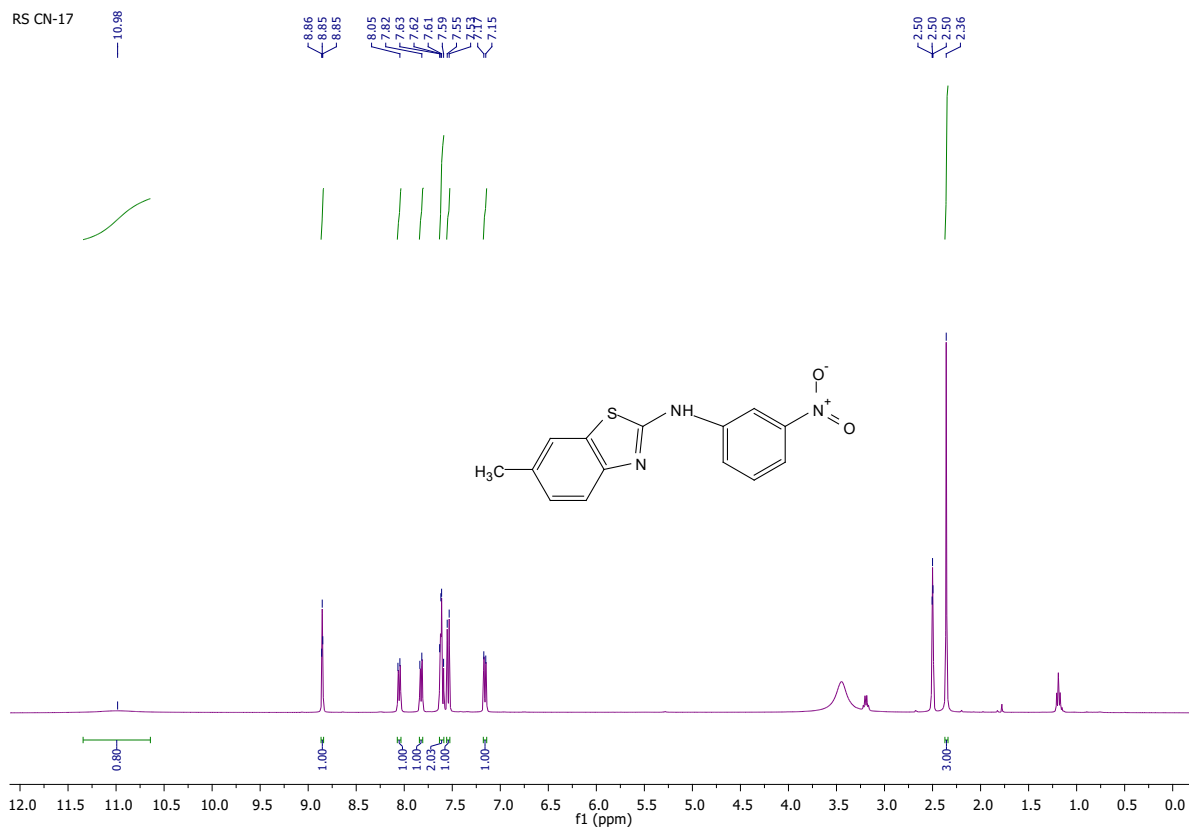

### <sup>13</sup>C NMR of 6b:

RS CN-17

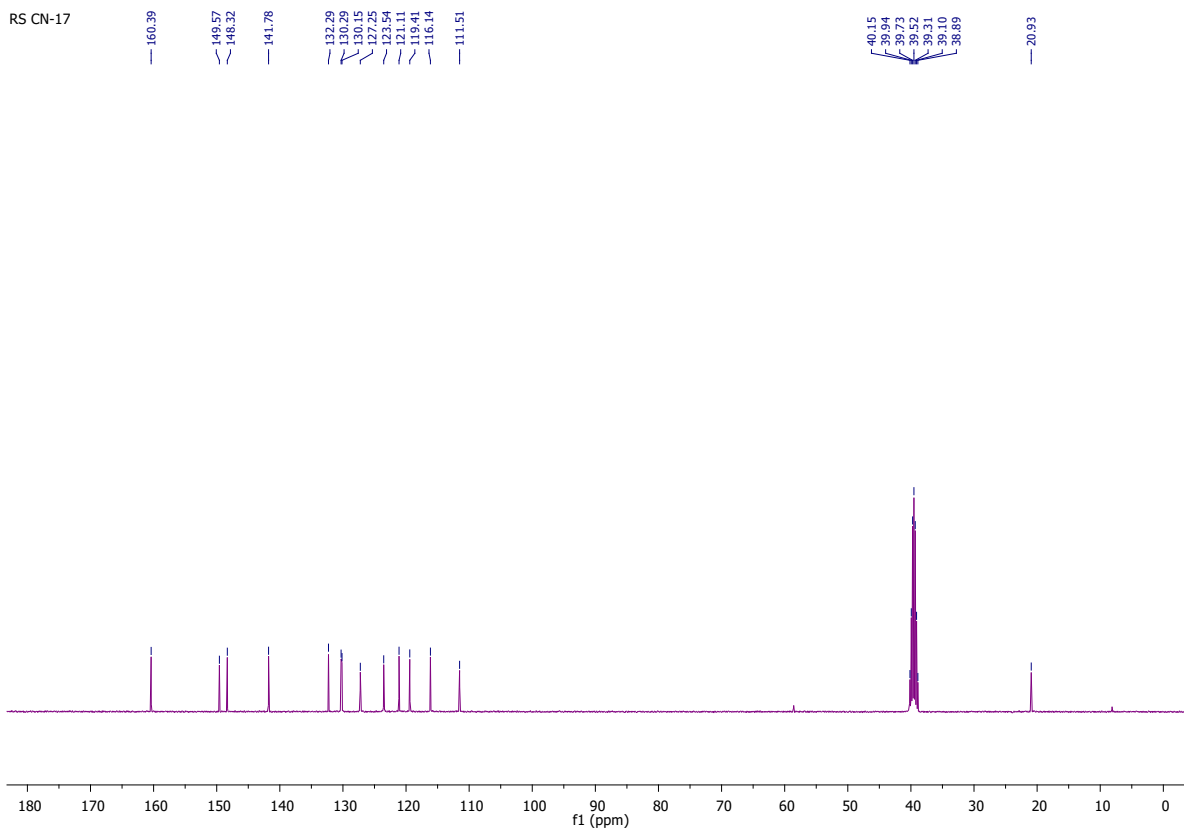

### 6c. 6-Methyl-N-(4-(trifluoromethyl)phenyl)benzo[d]thiazol-2-amine

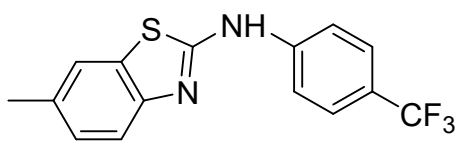

**<sup>1</sup>H NMR of 6c:**

RS CN-24

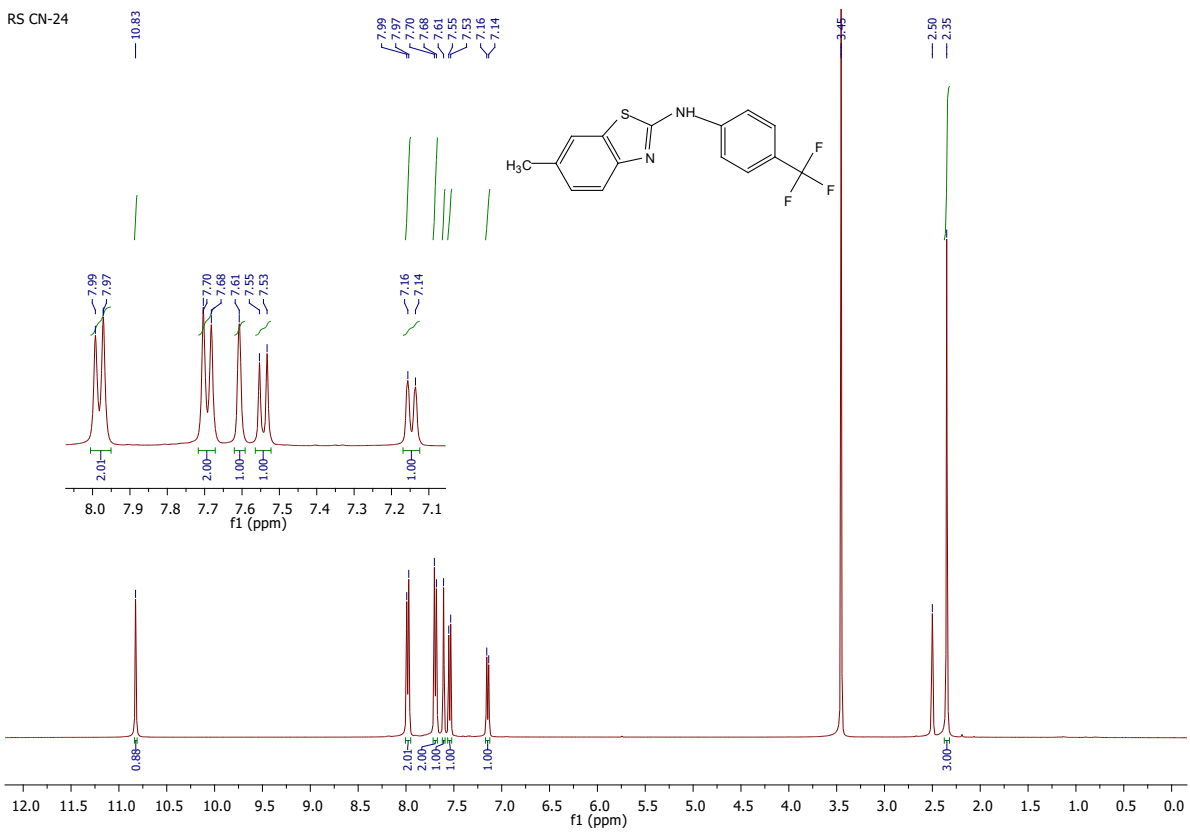

### <sup>13</sup>C NMR of 6c:

RS CN-24

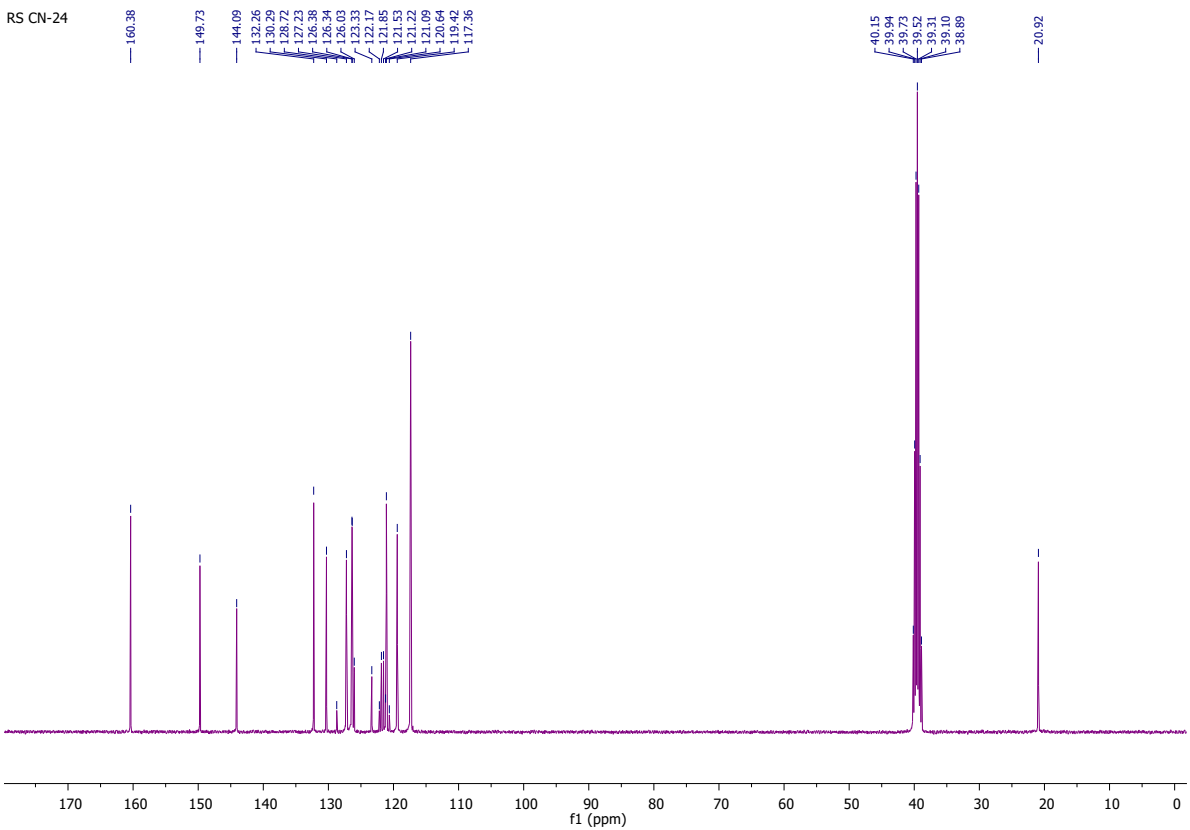

### 6d. *N*-(4-Chlorophenyl)-6-methylbenzo[*d*]thiazol-2-amine

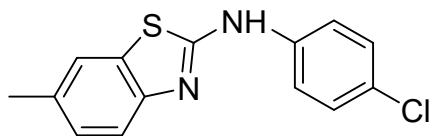

### <sup>1</sup>H NMR of 6d:

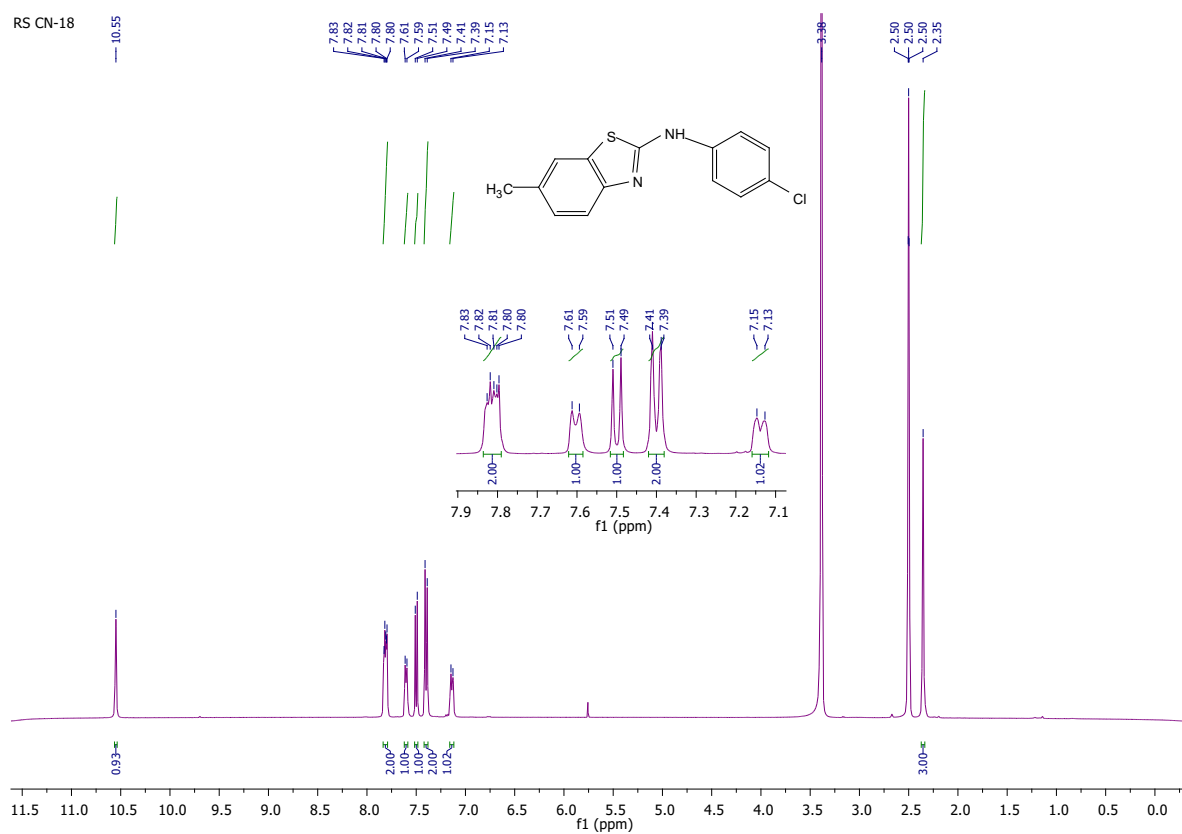

### <sup>13</sup>C NMR of 6d:

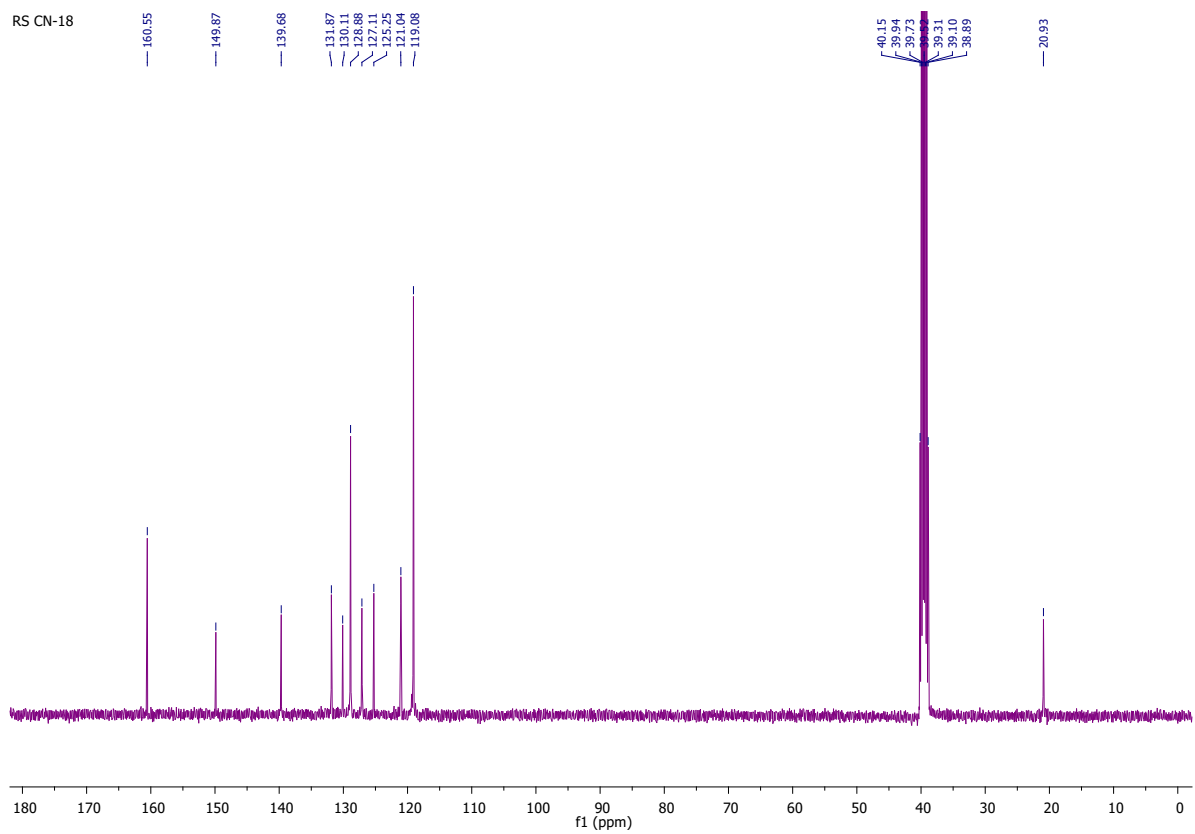

**6e. *N*-(4-Fluorophenyl)-6-methylbenzo[*d*]thiazol-2-amine**

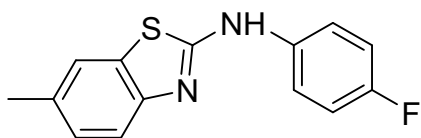

**<sup>1</sup>H NMR of 6e:**

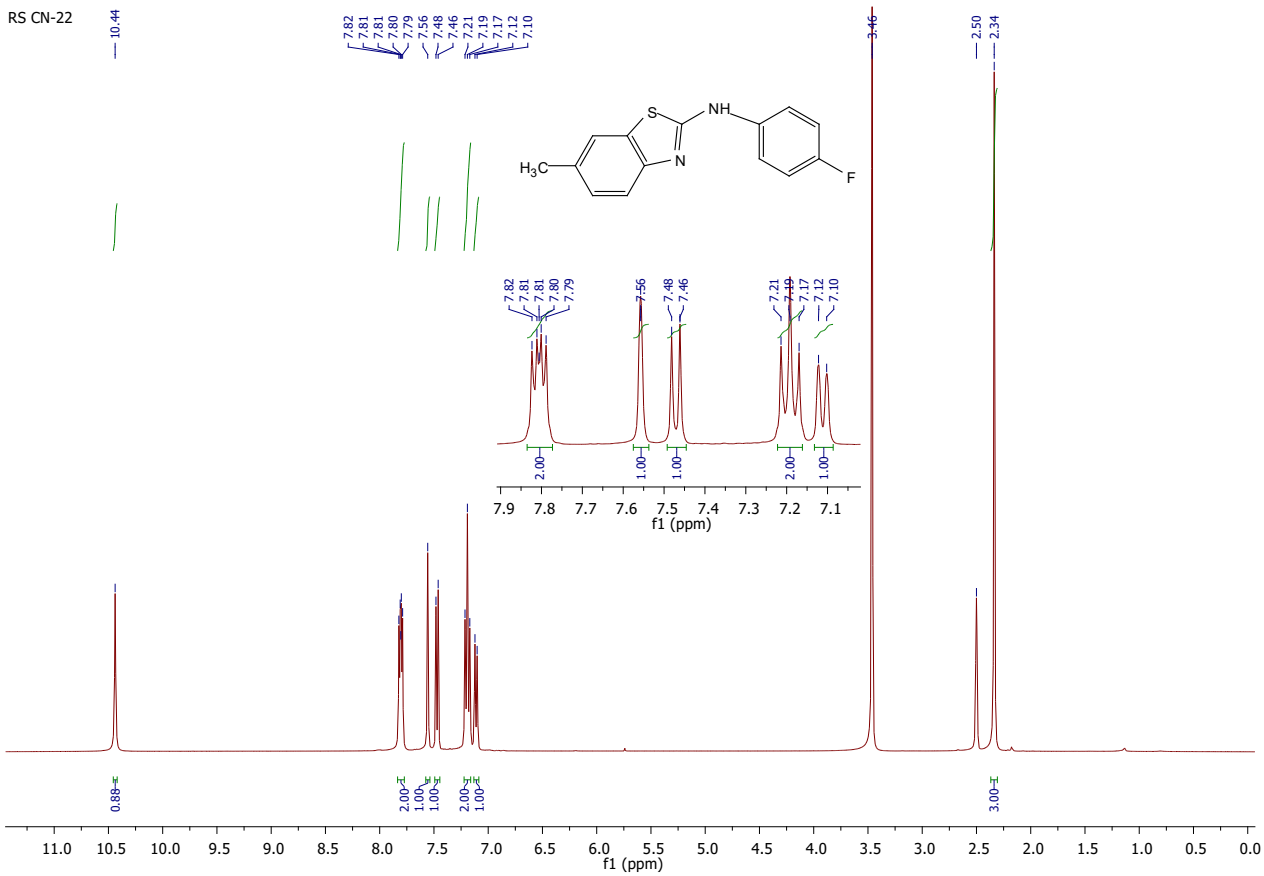

**<sup>13</sup>C NMR of 6e:**

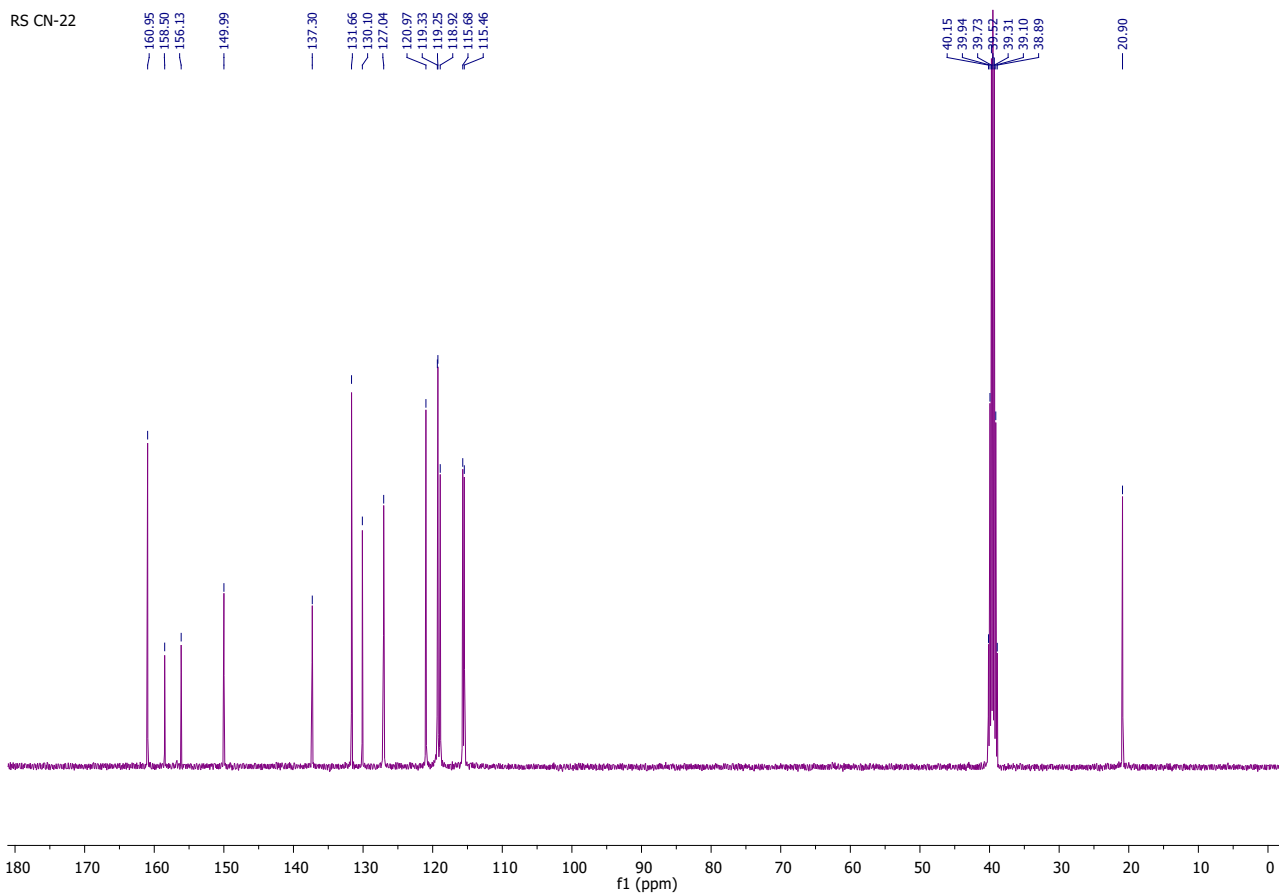

**6f. *N*-(3-Fluorophenyl)-6-methylbenzo[*d*]thiazol-2-amine**

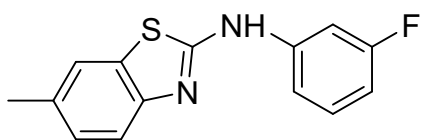

**<sup>1</sup>H NMR of 6f:**



RS CN-23

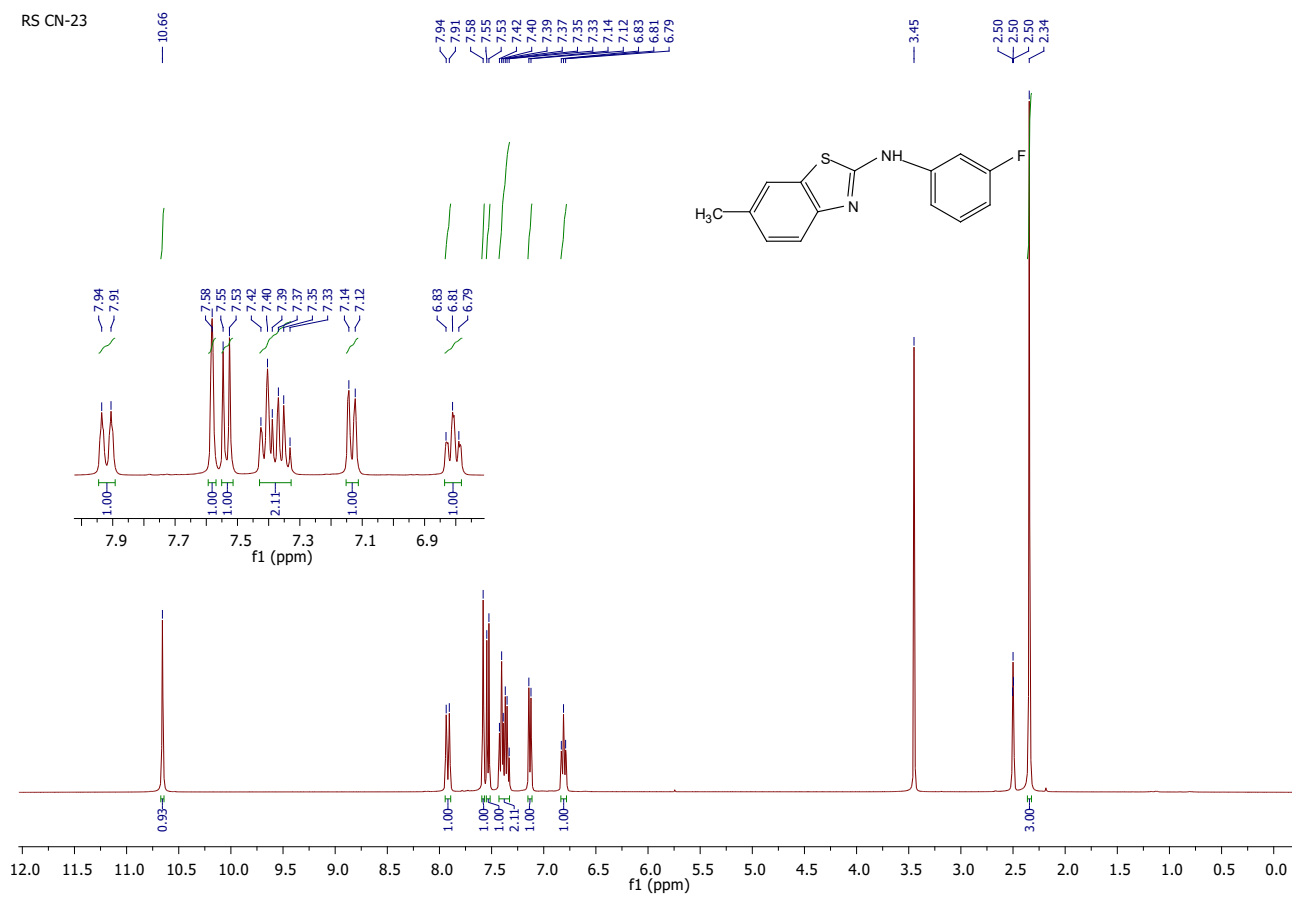

**<sup>13</sup>C NMR of 6f:**

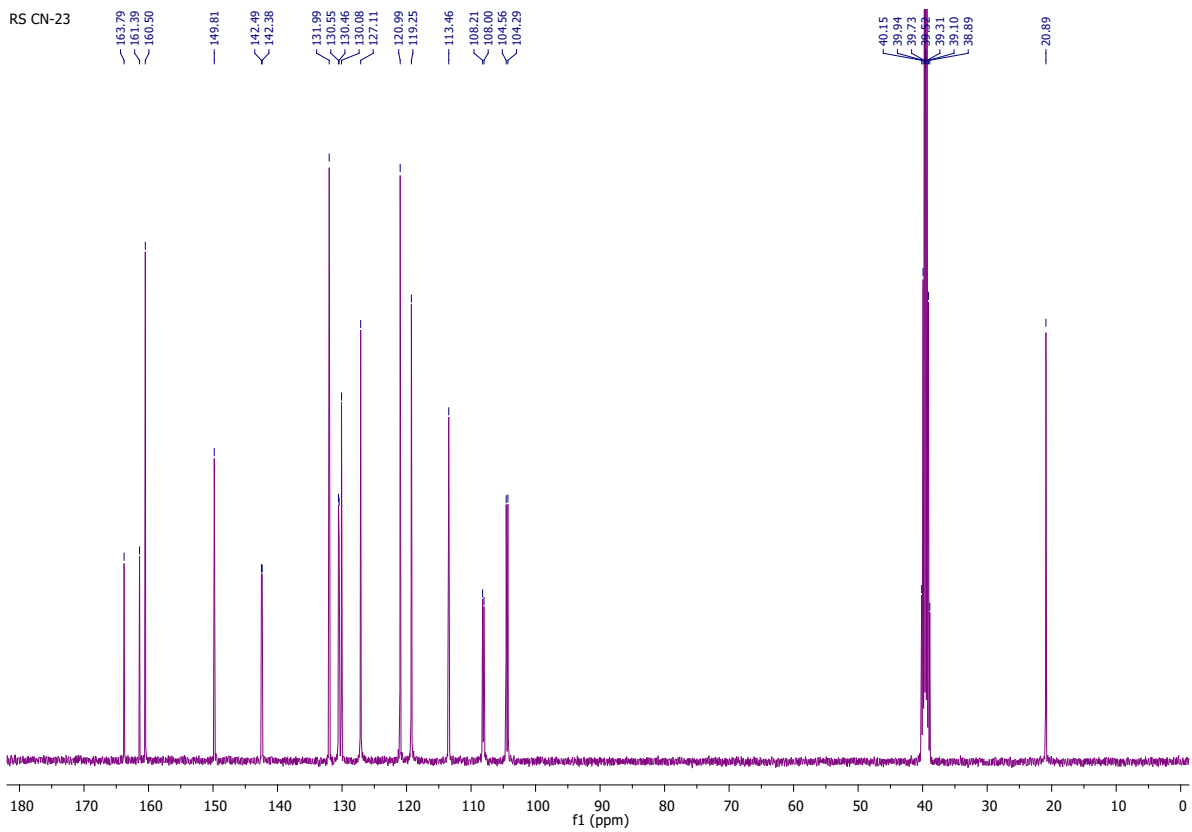

**6g. *N*-(4-Methoxyphenyl)-6-methylbenzo[*d*]thiazol-2-amine**

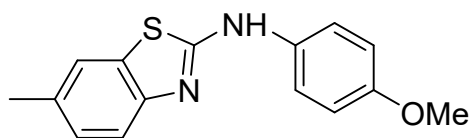

**<sup>1</sup>H NMR of 6g:**

RS CN-5

7.40  
7.40  
7.38  
7.37  
7.35  
7.26  
7.10  
7.08  
6.96  
6.93

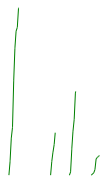

3.84

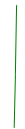

2.39

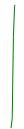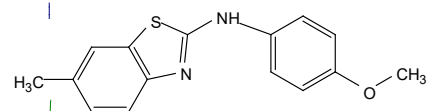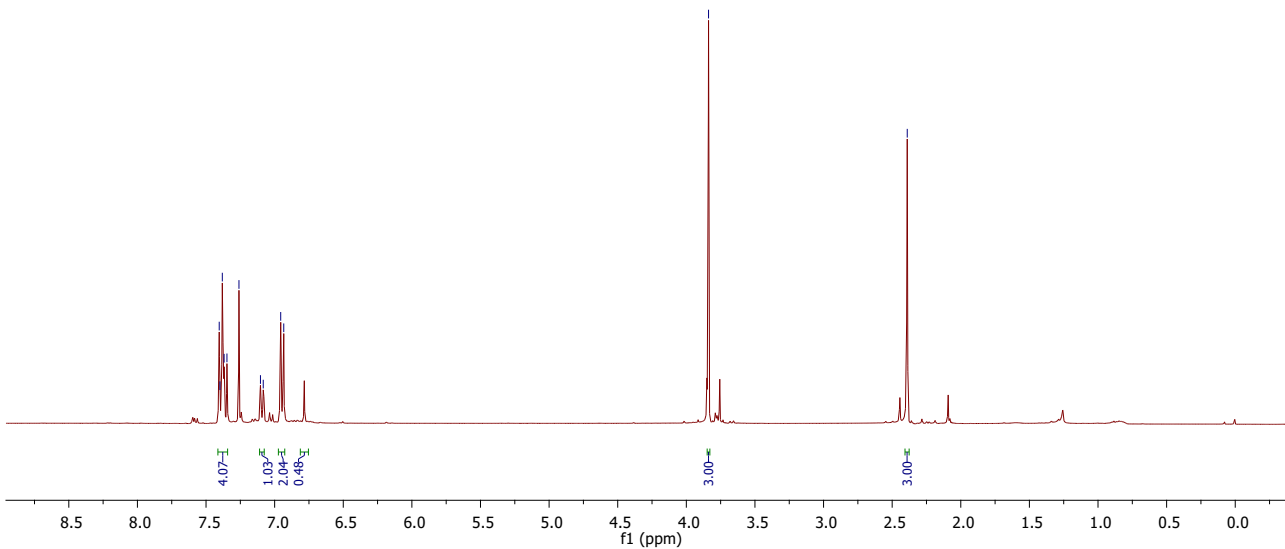

### <sup>13</sup>C NMR of 6g:

RS CN-5

166.45

157.29

149.61

133.22

131.87

129.98

127.34

126.62

120.99

118.61

114.87

77.48

77.16

76.84

55.67

21.39

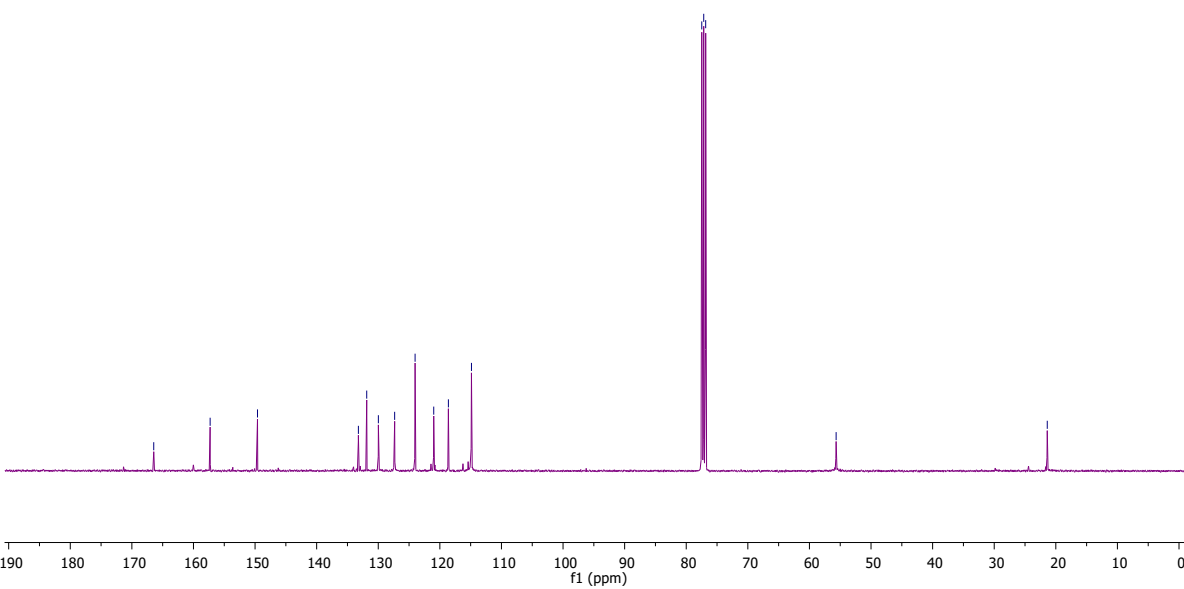

## 8a. *N*-(4-Chlorophenyl)thiazol-2-amine

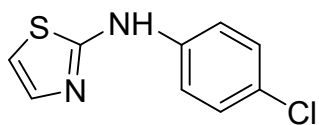

### <sup>1</sup>H NMR of 8a:

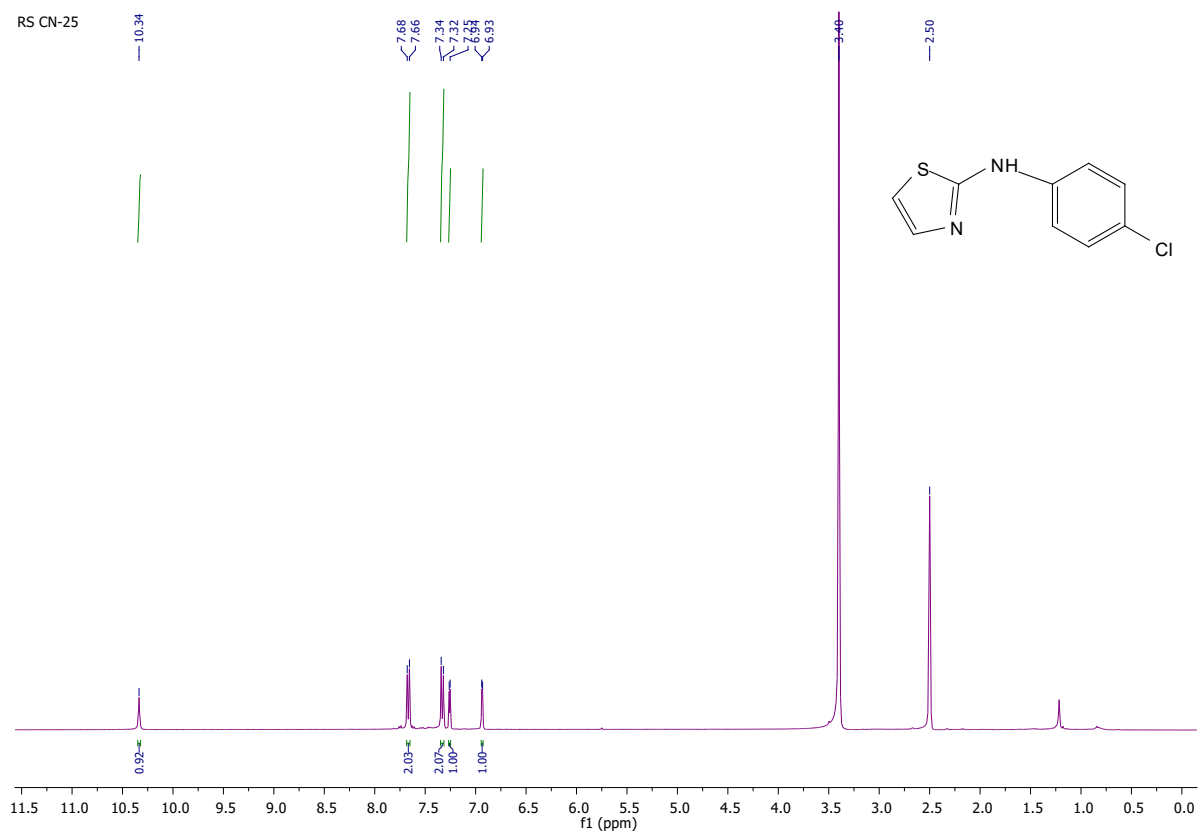

### <sup>13</sup>C NMR of 8a:

RS CN 25

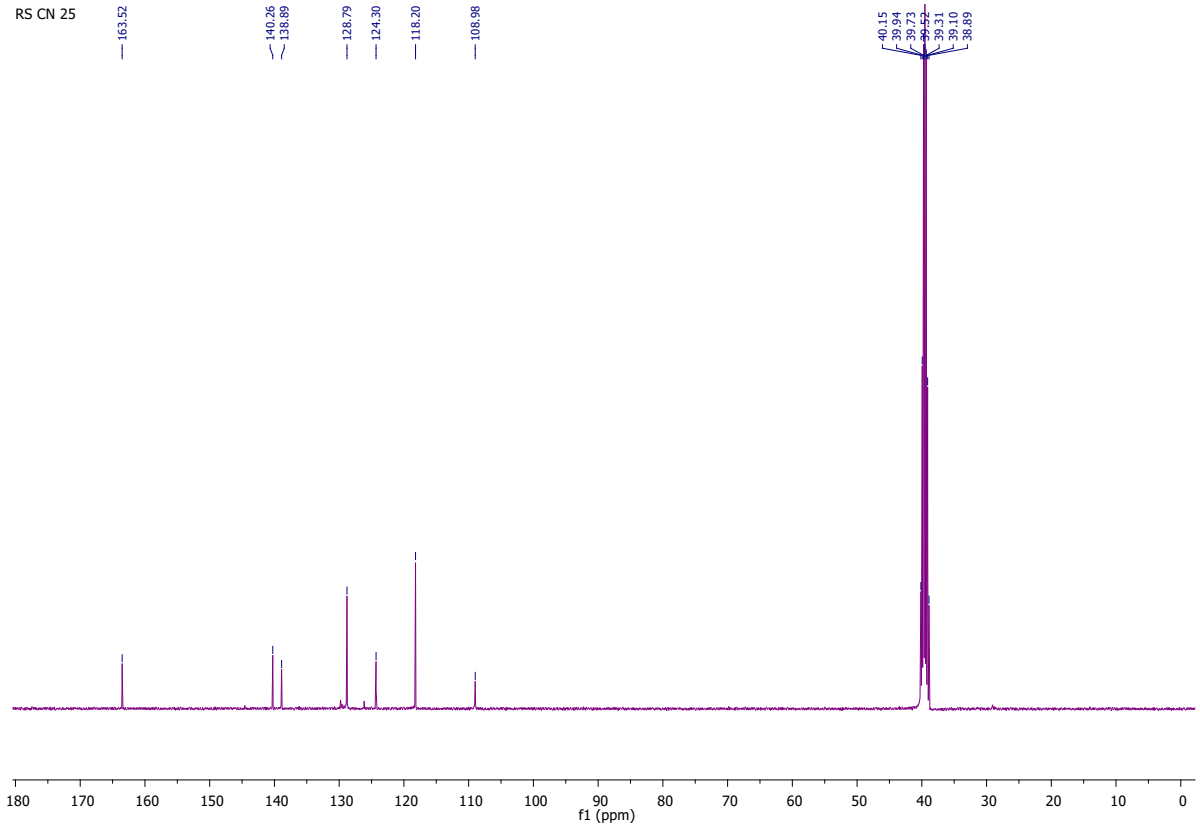

Supplement: d3ra02979d1.pdf [file d3ra02979d1.pdf]
